# Supplementary material
Source: publisher figshare collection journal article supplement (https://gsapubs.figshare.com/ndownloader/files/22410423)
Supplement: Supplementary file 1 [file 22410423]

## Sheet: ALL SAMPLES
Appendix II. New U/Pb detrital zircon geochronologic analyses by LA-ICP-MS
	Isotope Ratios										Apparent Ages (Ma)
Analysis	U	206Pb	U/Th	206Pb*	± 1σ	207Pb*	± 1σ	206Pb*	± 1σ	error	206Pb*	± 1σ	207Pb*	± 1σ	206Pb*	± 1σ	Best Age	± 1σ	% conc
	(ppm)	204Pb		207Pb*	(%)	235U	(%)	238U	(%)	corr.	238U	(Ma)	235U	(Ma)	207Pb*	(Ma)	(Ma)	(Ma)
Sample TS12-KBR-1: Red Butte Conglomerate; lense of sandstone in fluvial conglomerate
TS12-KBR-1-1	82.2327	16263.7	0.884241	13.2687	1.99258	1.92548	2.75768	0.185297	1.90641	0.69131	1095.85	19.2122	1089.97	18.4316	1078.27	40.0137	1078.27	40.0137	101.63
TS12-KBR-1-2	161.731	393832	1.69443	6.16722	0.217052	10.6697	1.72101	0.477244	1.70726	0.992015	2515.25	35.5559	2494.79	15.9787	2478.16	3.66215	2478.16	3.66215	101.497
TS12-KBR-1-3	195.932	7306.29	2.51537	9.44725	0.446095	4.01873	3.71095	0.275355	3.68404	0.992748	1567.93	51.2759	1637.99	30.1813	1729.13	8.18842	1729.13	8.18842	90.6773
TS12-KBR-1-4	66.7884	11614.8	1.96344	14.0657	2.27277	1.54808	2.57368	0.157927	1.20762	0.469217	945.245	10.6175	949.73	15.8782	960.158	46.445	960.158	46.445	98.4468
TS12-KBR-1-5	39.0073	32026.4	0.416956	10.8588	1.57639	3.26383	4.13853	0.257045	3.82654	0.924614	1474.71	50.442	1472.48	32.1773	1469.25	29.9308	1469.25	29.9308	100.372
TS12-KBR-1-6	45.645	20287.3	1.10792	12.976	5.34034	1.91388	5.74804	0.180117	2.1262	0.369901	1067.61	20.9196	1085.94	38.353	1122.9	106.564	1122.9	106.564	95.0761
TS12-KBR-1-7	328.403	438141	4.40478	9.35383	0.151529	4.03187	3.03276	0.273524	3.02898	0.998751	1558.66	41.9381	1640.65	24.6792	1747.34	2.77511	1747.34	2.77511	89.2019
TS12-KBR-1-8	71.9004	54511.3	1.07496	13.8069	3.61739	1.71874	4.4985	0.172109	2.67413	0.59445	1023.72	25.3127	1015.55	28.884	997.964	73.5083	997.964	73.5083	102.581
TS12-KBR-1-9	160.589	69960	1.2683	4.9493	0.222818	15.3926	1.80631	0.552528	1.79252	0.992363	2835.68	41.1246	2839.85	17.2238	2842.8	3.63184	2842.8	3.63184	99.7493
TS12-KBR-1-10	466.896	9613.93	1.43245	9.11406	0.692919	4.09226	4.33762	0.270504	4.28191	0.987158	1543.36	58.7713	1652.76	35.4087	1794.76	12.616	1794.76	12.616	85.9926
TS12-KBR-1-12	120.288	123121	2.24312	10.7077	0.479913	3.30545	1.88634	0.2567	1.82427	0.967095	1472.94	24.0217	1482.34	14.7059	1495.81	9.0792	1495.81	9.0792	98.471
TS12-KBR-1-13	292.846	428444	3.91913	11.3306	0.391272	2.97057	1.41796	0.244114	1.36291	0.961175	1408.05	17.2393	1400.12	10.7721	1388.05	7.51075	1388.05	7.51075	101.441
TS12-KBR-1-14	215.565	10812	0.809347	15.9747	2.444	0.867087	3.88044	0.10046	3.01408	0.776736	617.106	17.7376	633.985	18.3002	694.623	52.0776	617.106	17.7376	88.8404
TS12-KBR-1-15	38.3707	79030.2	1.4847	6.07907	1.78198	10.2523	2.28449	0.45202	1.42948	0.625735	2404.22	28.687	2457.81	21.1379	2502.42	29.9927	2502.42	29.9927	96.0758
TS12-KBR-1-16	32.8714	90070.5	0.825596	5.90889	0.411053	11.3198	1.87794	0.485113	1.8324	0.975751	2549.5	38.5858	2549.84	17.5223	2550.1	6.88298	2550.1	6.88298	99.9765
TS12-KBR-1-17	228.556	23215	3.73583	5.70628	0.72717	8.76609	3.88641	0.362792	3.81778	0.98234	1995.39	65.5197	2313.97	35.4356	2608.37	12.1101	2608.37	12.1101	76.4997
TS12-KBR-1-18	86.1525	106664	0.896314	9.76663	1.34539	4.21208	4.6585	0.29836	4.46	0.957389	1683.17	66.0714	1676.38	38.2444	1667.87	24.8869	1667.87	24.8869	100.918
TS12-KBR-1-19	79.927	157769	2.76657	9.86275	1.01028	4.17351	1.6173	0.298537	1.26293	0.780887	1684.05	18.7173	1668.83	13.2484	1649.73	18.7308	1649.73	18.7308	102.08
TS12-KBR-1-20	131.454	214042	1.96738	9.53471	0.45664	4.46176	1.3043	0.308541	1.22176	0.936712	1733.52	18.5708	1723.89	10.8193	1712.19	8.39987	1712.19	8.39987	101.246
TS12-KBR-1-21	165.807	36655	1.07339	18.1307	1.91695	0.535062	2.85612	0.0703588	2.11724	0.7413	438.317	8.97176	435.163	10.1088	418.489	42.8164	438.317	8.97176	104.738
TS12-KBR-1-22	31.9762	103931	0.801795	5.26135	0.589606	14.0912	6.48838	0.537707	6.46154	0.995863	2773.84	145.68	2755.87	61.5918	2742.71	9.69463	2742.71	9.69463	101.135
TS12-KBR-1-23	201.764	23298.4	7.56409	8.59959	1.41855	5.53017	3.45012	0.344917	3.145	0.911563	1910.28	51.9957	1905.3	29.6757	1899.86	25.4998	1899.86	25.4998	100.549
TS12-KBR-1-24	320.804	48841.6	2.39887	9.50893	0.291051	4.40867	1.40914	0.304045	1.37876	0.978437	1711.34	20.723	1713.97	11.6633	1717.17	5.3505	1717.17	5.3505	99.6601
TS12-KBR-1-25	408.727	57329	4.64213	10.1439	0.365864	3.19818	5.37332	0.235291	5.36085	0.997679	1362.17	65.8269	1456.72	41.587	1597.45	6.82953	1597.45	6.82953	85.2718
TS12-KBR-1-26	33.8683	51958.4	1.95821	9.93169	0.663562	4.01218	2.2343	0.289003	2.13349	0.954881	1636.54	30.8361	1636.67	18.1623	1636.81	12.3239	1636.81	12.3239	99.984
TS12-KBR-1-27	98.6368	343579	4.20186	7.56327	3.70646	6.46014	3.87649	0.354364	1.13548	0.292916	1955.41	19.1521	2040.49	34.0978	2127.62	64.9145	2127.62	64.9145	91.906
TS12-KBR-1-28	682.032	3557.26	1.28223	16.9578	2.13601	0.440543	4.55905	0.0541823	4.0277	0.883452	340.147	13.345	370.635	14.1577	566	46.5166	340.147	13.345	NA
TS12-KBR-1-29	88.9225	65848.6	2.15007	12.7193	1.56381	2.09729	2.0652	0.193473	1.34891	0.65316	1140.16	14.0964	1147.92	14.2003	1162.58	30.9912	1162.58	30.9912	98.0715
TS12-KBR-1-30	131.382	101440	1.33577	13.9565	1.39883	1.61402	1.86136	0.163375	1.22797	0.65972	975.505	11.1166	975.671	11.6702	976.063	28.5135	976.063	28.5135	99.9428
TS12-KBR-1-31	185.5	91255.2	4.12601	9.29994	0.447987	4.61538	1.55744	0.311305	1.49162	0.957738	1747.13	22.8276	1752.05	12.9985	1757.92	8.19368	1757.92	8.19368	99.3861
TS12-KBR-1-32	266.697	391498	1.06254	11.5591	0.415562	2.58461	1.49017	0.216679	1.43106	0.960329	1264.3	16.4293	1296.29	10.9103	1349.63	8.0203	1349.63	8.0203	93.6778
TS12-KBR-1-33	109.436	106577	1.46717	13.5301	0.853755	1.74113	1.81665	0.170857	1.60353	0.882687	1016.83	15.0843	1023.88	11.7171	1038.97	17.2553	1038.97	17.2553	97.8687
TS12-KBR-1-34	198.75	18742.7	53.271	7.9185	0.96755	6.00333	1.96639	0.344774	1.71188	0.870571	1909.59	28.2931	1976.33	17.117	2046.89	17.0952	2046.89	17.0952	93.2925
TS12-KBR-1-35	133.539	512213	1.70146	6.151	0.135116	10.7231	2.01239	0.47837	2.00785	0.997743	2520.16	41.8829	2499.43	18.6926	2482.61	2.27868	2482.61	2.27868	101.513
TS12-KBR-1-36	73.6718	42443.8	1.10247	9.73447	1.62762	4.39653	6.6724	0.3104	6.47084	0.969792	1742.67	98.8168	1711.69	55.2505	1673.96	30.0835	1673.96	30.0835	104.105
TS12-KBR-1-37	59.5173	12401.4	2.07315	10.6855	1.06737	2.74049	3.95992	0.212384	3.81335	0.962988	1241.51	43.0639	1339.51	29.4671	1499.73	20.1813	1499.73	20.1813	82.7819
TS12-KBR-1-38	164.296	8928.1	0.794355	5.75673	0.264036	11.2445	1.67201	0.469478	1.65103	0.987453	2481.27	34.0039	2543.61	15.592	2593.7	4.40125	2593.7	4.40125	95.6652
TS12-KBR-1-39	324.957	3180.83	1.45117	17.2205	1.94778	0.445871	2.98702	0.055687	2.2646	0.758147	349.343	7.70066	374.384	9.35318	532.433	42.6688	349.343	7.70066	NA
TS12-KBR-1-40	50.254	143288	1.00828	9.76394	1.16467	4.1779	1.67771	0.295857	1.20758	0.71978	1670.73	17.773	1669.69	13.746	1668.38	21.5421	1668.38	21.5421	100.141
TS12-KBR-1-41	261.393	581722	2.96043	5.29869	0.356501	13.8613	1.06051	0.532687	0.998799	0.941806	2752.76	22.3777	2740.28	10.044	2731.08	5.86649	2731.08	5.86649	100.794
TS12-KBR-1-42	83.009	10687.7	0.923766	6.22124	0.731162	8.3091	1.36911	0.374912	1.15752	0.845457	2052.47	20.3471	2265.31	12.4089	2463.44	12.3518	2463.44	12.3518	83.3172
TS12-KBR-1-43	159.882	50125.5	1.73645	17.6243	2.94404	0.60979	3.2159	0.0779455	1.29407	0.402398	483.848	6.03213	483.428	12.3699	481.413	65.0506	483.848	6.03213	100.506
TS12-KBR-1-44	34.0615	20126.5	1.3573	13.1785	2.71205	1.90195	3.27418	0.181787	1.83441	0.560265	1076.73	18.1903	1081.77	21.7926	1091.92	54.3349	1091.92	54.3349	98.6085
TS12-KBR-1-45	144.398	170888	2.01914	13.4288	0.516369	1.79871	1.67717	0.175186	1.5957	0.951425	1040.62	15.3343	1044.99	10.9453	1054.16	10.42	1054.16	10.42	98.7158
TS12-KBR-1-46	119.311	66748.5	1.43542	14.1272	0.898332	1.5763	3.4035	0.161507	3.28281	0.964538	965.149	29.4264	960.912	21.1476	951.224	18.3867	951.224	18.3867	101.464
TS12-KBR-1-47	75.3169	102863	0.916519	13.406	2.73074	1.83057	3.43003	0.177985	2.07561	0.605129	1055.96	20.2166	1056.48	22.5274	1057.59	54.9859	1057.59	54.9859	99.8453
TS12-KBR-1-48	109.684	237258	1.75463	9.47906	0.589233	4.47465	1.19912	0.307626	1.04437	0.870942	1729.01	15.8384	1726.28	9.952	1722.95	10.8243	1722.95	10.8243	100.352
TS12-KBR-1-49	69.2614	76232.6	2.24446	12.8634	0.720508	2.10374	1.13892	0.196267	0.882047	0.774459	1155.23	9.32886	1150.03	7.8386	1140.25	14.3181	1140.25	14.3181	101.314
TS12-KBR-1-50	92.9573	149876	1.9621	9.79443	0.704633	4.26065	1.28664	0.302659	1.07654	0.836706	1704.48	16.124	1685.79	10.5813	1662.61	13.0418	1662.61	13.0418	102.519
TS12-KBR-1-51	9.94711	9164.58	1.4332	12.7288	9.77721	2.00687	10.5533	0.18527	3.97218	0.376393	1095.7	40.026	1117.83	71.6378	1161.1	194.284	1161.1	194.284	94.3678
TS12-KBR-1-52	285.32	1.02384e+06	1.09164	5.05793	0.157027	15.1022	0.867392	0.554002	0.85306	0.983477	2841.8	19.6047	2821.7	8.26057	2807.37	2.56756	2807.37	2.56756	101.226
TS12-KBR-1-53	171.239	187361	3.01026	9.92922	0.312258	4.06892	2.01819	0.293017	1.99388	0.987958	1656.59	29.1279	1648.1	16.451	1637.27	5.79895	1637.27	5.79895	101.18
TS12-KBR-1-54	37.4214	48059.8	0.859462	9.03421	1.16145	4.97169	1.51717	0.325757	0.976135	0.643392	1817.78	15.4617	1814.52	12.8261	1810.76	21.1036	1810.76	21.1036	100.388
TS12-KBR-1-55	65.1123	41337.3	1.59233	17.348	6.7744	0.559226	7.04615	0.0703618	1.93798	0.275042	438.335	8.21249	451.023	25.6657	516.213	148.939	438.335	8.21249	84.9136
TS12-KBR-1-56	161.9	250029	2.06798	9.04009	0.331822	4.98376	1.62092	0.32676	1.58659	0.978822	1822.66	25.1897	1816.57	13.7089	1809.58	6.0304	1809.58	6.0304	100.723
TS12-KBR-1-57	124.953	110973	0.800879	5.26075	0.154314	13.9589	3.01726	0.532597	3.01331	0.998691	2752.38	67.507	2746.92	28.5962	2742.9	2.53817	2742.9	2.53817	100.346
TS12-KBR-1-58	71.2562	72765.2	2.01226	10.6066	0.861316	3.39411	3.33296	0.261097	3.21975	0.966032	1495.45	42.9734	1503.04	26.1464	1513.73	16.2546	1513.73	16.2546	98.7926
TS12-KBR-1-59	82.0591	89391.8	1.26714	9.93093	0.773975	4.05514	2.2263	0.292075	2.08743	0.937624	1651.89	30.4187	1645.33	18.1356	1636.95	14.3743	1636.95	14.3743	100.913
TS12-KBR-1-60	94.8757	397652	3.21361	2.93016	0.357002	35.2178	4.76869	0.74843	4.75531	0.997194	3601.73	131.238	3644.77	47.1173	3668.5	5.45505	3668.5	5.45505	98.18
TS12-KBR-1-61	86.6848	53683.1	2.20276	13.0787	1.59952	2.01677	2.08462	0.191302	1.33687	0.641298	1128.42	13.839	1121.17	14.1514	1107.17	31.9594	1107.17	31.9594	101.92
TS12-KBR-1-62	70.8272	102638	1.43182	9.13925	0.340545	4.67237	2.69017	0.309704	2.66853	0.991955	1739.25	40.6789	1762.31	22.5037	1789.73	6.20412	1789.73	6.20412	97.1794
TS12-KBR-1-63	106.816	139721	2.34934	12.3036	1.65549	2.33823	2.53643	0.208649	1.92168	0.757631	1221.62	21.3854	1223.98	18.0414	1228.14	32.5224	1228.14	32.5224	99.4693
TS12-KBR-1-64	630.292	420979	1.63767	17.952	0.693826	0.54529	1.42922	0.070997	1.2495	0.874259	442.16	5.33959	441.907	5.12093	440.567	15.4526	442.16	5.33959	100.361
TS12-KBR-1-65	91.4835	37647	2.22205	18.0433	4.40523	0.505677	4.89526	0.0661739	2.13484	0.436104	413.064	8.54168	415.538	16.695	429.279	98.2518	413.064	8.54168	96.2227
TS12-KBR-1-66	220.395	4576.99	0.367378	9.34669	1.13567	4.2303	3.2956	0.286766	3.09374	0.938749	1625.35	44.4465	1679.92	27.0715	1748.74	20.7939	1748.74	20.7939	92.9439
TS12-KBR-1-67	26.5402	36931.6	1.06754	9.68151	5.32889	3.97058	6.37646	0.278801	3.50173	0.549165	1585.32	49.2154	1628.2	51.7645	1684.04	98.4358	1684.04	98.4358	94.138
TS12-KBR-1-68	245.897	93388.2	10.5692	10.0529	0.339257	3.92591	4.60792	0.286241	4.59541	0.997286	1622.72	65.9277	1619.04	37.3065	1614.24	6.31741	1614.24	6.31741	100.525
TS12-KBR-1-69	135.666	213333	1.30804	9.3943	0.400175	4.52629	2.28747	0.308394	2.2522	0.984579	1732.8	34.2212	1735.81	19.0259	1739.44	7.33427	1739.44	7.33427	99.6183
TS12-KBR-1-70	446.131	114751	1.65331	11.3083	0.470162	2.38732	9.51153	0.195797	9.4999	0.998778	1152.7	100.281	1238.81	68.169	1391.85	9.02042	1391.85	9.02042	82.8181
TS12-KBR-1-71	476.3	57452.1	2.46536	5.77357	0.960734	10.5884	1.85841	0.443377	1.59081	0.856006	2365.74	31.5016	2487.69	17.2433	2588.83	16.0309	2588.83	16.0309	91.3828
TS12-KBR-1-72	123.147	88284.7	2.4487	9.22941	0.389699	4.77316	1.18974	0.319506	1.12411	0.944834	1787.31	17.5467	1780.19	9.98827	1771.83	7.11525	1771.83	7.11525	100.874
TS12-KBR-1-74	282.071	542808	1.27699	9.32845	0.173358	4.60338	2.28129	0.311447	2.27469	0.997108	1747.82	34.824	1749.88	19.0321	1752.32	3.17292	1752.32	3.17292	99.7435
TS12-KBR-1-75	39.5082	75587.5	0.489427	8.99243	1.72511	4.89263	4.16054	0.319094	3.78604	0.909987	1785.3	59.0415	1800.99	35.0902	1819.18	31.3153	1819.18	31.3153	98.1378
TS12-KBR-1-76	100.628	79035.7	2.87188	13.552	1.15521	1.74767	2.46856	0.171776	2.18157	0.883745	1021.89	20.6161	1026.3	15.9442	1035.71	23.3524	1035.71	23.3524	98.6659
TS12-KBR-1-77	52.8635	31575.3	1.17179	19.1222	8.53956	0.548611	8.69344	0.0760854	1.62842	0.187316	472.714	7.42231	444.086	31.281	298.317	195.125	472.714	7.42231	158.461
TS12-KBR-1-78	847.577	12384.6	6.33192	5.74005	0.404566	8.69663	2.22385	0.362047	2.18674	0.983313	1991.87	37.4709	2306.73	20.2546	2598.53	6.74242	2598.53	6.74242	76.6537
TS12-KBR-1-79	283.734	32667.5	2.15001	18.0839	1.18644	0.519605	2.2665	0.0681497	1.93116	0.852046	424.999	7.94272	424.887	7.86931	424.262	26.4718	424.999	7.94272	100.174
TS12-KBR-1-80	288.808	618074	1.98779	10.7217	0.29325	3.32034	1.23279	0.258193	1.19741	0.971296	1480.59	15.8401	1485.84	9.62049	1493.33	5.54964	1493.33	5.54964	99.1468
TS12-KBR-1-81	113.261	56486.1	0.922685	9.04255	0.627573	5.04278	2.61569	0.330719	2.53929	0.970791	1841.87	40.6827	1826.54	22.1676	1809.09	11.4042	1809.09	11.4042	101.812
TS12-KBR-1-82	231.608	182006	1.47407	18.1312	1.31434	0.52906	2.04097	0.0695713	1.56143	0.765042	433.572	6.54726	431.186	7.17057	418.434	29.3554	433.572	6.54726	103.618
TS12-KBR-1-83	76.2491	128891	1.58772	9.87432	0.825712	4.01912	1.77493	0.287831	1.57117	0.885201	1630.68	22.6371	1638.07	14.4326	1647.56	15.3143	1647.56	15.3143	98.9757
TS12-KBR-1-84	145.776	153265	3.44292	12.5973	0.778785	2.2044	2.25712	0.201404	2.11851	0.93859	1182.86	22.8945	1182.44	15.7675	1181.69	15.4124	1181.69	15.4124	100.099
TS12-KBR-1-85	111.05	77449.4	1.83774	11.386	0.553539	2.93487	2.54026	0.242359	2.47921	0.97597	1398.95	31.178	1390.95	19.2406	1378.68	10.6392	1378.68	10.6392	101.47
TS12-KBR-1-86	128.036	129870	1.46787	11.7343	0.9618	2.52631	2.30241	0.215002	2.09189	0.908568	1255.41	23.863	1279.64	16.7501	1320.53	18.6375	1320.53	18.6375	95.0686
TS12-KBR-1-87	70.2665	133607	1.5616	13.4368	0.971137	1.75172	2.65997	0.170709	2.47635	0.930971	1016.02	23.2777	1027.8	17.1952	1052.97	19.5834	1052.97	19.5834	96.4907
TS12-KBR-1-88	184.689	177466	2.33504	14.0657	0.815447	1.5918	1.8792	0.162386	1.69306	0.900945	970.023	15.2472	967.003	11.7195	960.162	16.6555	960.162	16.6555	101.027
TS12-KBR-1-89	227.8	436288	1.88626	5.01165	0.0954135	15.4439	1.49543	0.561355	1.49238	0.997962	2872.23	34.589	2843.03	14.2619	2822.39	1.55797	2822.39	1.55797	101.766
TS12-KBR-1-90	272.628	87909.4	2.31146	10.6921	0.22836	3.50876	0.925195	0.272091	0.89657	0.969061	1551.41	12.3623	1529.19	7.31084	1498.57	4.31859	1498.57	4.31859	103.526
TS12-KBR-1-91	249.853	333419	36.7964	6.0487	0.181321	10.8602	1.40688	0.47643	1.39514	0.99166	2511.7	29.0219	2511.23	13.0815	2510.84	3.04641	2510.84	3.04641	100.034
TS12-KBR-1-92	95.2202	74288.6	1.81187	10.8257	0.999662	3.21111	2.32044	0.252123	2.09407	0.902444	1449.41	27.1817	1459.84	17.9682	1475.04	18.965	1475.04	18.965	98.2628
TS12-KBR-1-93	33.5387	42487.8	0.880827	6.09242	0.693875	8.62414	1.97376	0.381069	1.84777	0.936169	2081.28	32.8669	2299.11	17.9607	2498.73	11.6801	2498.73	11.6801	83.2933
TS12-KBR-1-94	27.0381	49465.1	0.546898	8.90202	2.23628	5.21211	2.6589	0.336512	1.43832	0.540948	1869.87	23.3456	1854.6	22.6557	1837.5	40.5047	1837.5	40.5047	101.762
TS12-KBR-1-95	319.282	373134	1.93459	9.329	0.205574	4.72195	0.770778	0.319489	0.742858	0.963777	1787.23	11.5951	1771.14	6.45866	1752.21	3.76262	1752.21	3.76262	101.999
TS12-KBR-1-97	246.528	342714	1.74024	12.1787	0.33538	2.4201	2.43953	0.213763	2.41637	0.990505	1248.84	27.4336	1248.59	17.5297	1248.15	6.56582	1248.15	6.56582	100.055
TS12-KBR-1-98	197.601	58876.9	2.28342	13.4614	0.773247	1.87227	4.68413	0.182792	4.61987	0.986281	1082.21	46.0261	1071.33	31.0126	1049.28	15.6061	1049.28	15.6061	103.138
TS12-KBR-1-99	446.61	4297.31	2.01201	17.4633	1.77794	0.498847	4.1631	0.0631817	3.76435	0.904218	394.946	14.4209	410.922	14.0697	501.67	39.1281	394.946	14.4209	NA
TS12-KBR-1-100	21.9809	29611.3	0.979983	12.8387	5.41578	1.91782	5.70782	0.178578	1.80238	0.315773	1059.2	17.6049	1087.31	38.1113	1144.04	107.715	1144.04	107.715	92.584
Sample TS12-RHY-1: rhyolite tuff from beneath Sage Creek stratigraphy
TS12-RHY-1-1	668.773	23159.1	1.41131	21.5207	8.01762	0.0471431	8.27753	0.00735823	2.05796	0.24862	47.2606	0.969047	46.7742	3.78394	21.9225	192.715	47.2606	0.969047	NA
TS12-RHY-1-2-C	116.763	17754.9	0.75964	22.4251	14.9671	0.0933335	15.4287	0.01518	3.74591	0.242788	97.121	3.61079	90.6039	13.3742	-77.8186	367.907	97.121	3.61079	NA
TS12-RHY-1-2-R	124.021	6769.77	0.994029	20.6197	18.1787	0.10047	18.5059	0.015025	3.46473	0.187223	96.1373	3.30618	97.2098	17.1569	123.578	431.196	96.1373	3.30618	NA
TS12-RHY-1-3	238.972	15599	0.873559	20.1706	17.317	0.0490669	18.2274	0.00717805	5.68873	0.312098	46.1074	2.61357	48.638	8.65667	175.19	406.585	46.1074	2.61357	NA
TS12-RHY-1-4	839.194	24936.6	1.32273	21.5491	4.46162	0.0477006	4.79334	0.00745508	1.75214	0.365536	47.8803	0.835821	47.3146	2.21592	18.767	107.208	47.8803	0.835821	NA
TS12-RHY-1-5	216.67	7931.47	1.1834	20.0676	16.0866	0.050067	16.7202	0.00728695	4.55909	0.272669	46.8044	2.12612	49.6055	8.09497	187.121	376.545	46.8044	2.12612	NA
TS12-RHY-1-6	324.563	15741.9	1.49898	22.5247	12.428	0.0461031	12.9498	0.00753161	3.63925	0.281027	48.37	1.75372	45.7653	5.79501	-88.6737	305.673	48.37	1.75372	NA
TS12-RHY-1-7	686.63	18509.7	1.4221	19.8042	5.86888	0.0508781	6.02192	0.0073078	1.34896	0.224008	46.9378	0.630871	50.3895	2.96036	217.795	135.972	46.9378	0.630871	NA
TS12-RHY-1-9	1148.92	42328.6	1.27828	21.3448	3.92545	0.0479426	4.10478	0.00742185	1.20002	0.292346	47.6676	0.56991	47.5492	1.90679	41.6029	93.886	47.6676	0.56991	NA
TS12-RHY-1-10	296.45	15316.4	1.24504	21.703	12.1805	0.04684	12.988	0.00737286	4.5083	0.347112	47.3542	2.12705	46.4803	5.90085	1.61866	294.424	47.3542	2.12705	NA
TS12-RHY-1-11	1319.71	27685.7	1.26212	21.0237	4.50363	0.0481124	4.85309	0.00733609	1.80827	0.372601	47.1188	0.848928	47.7137	2.26203	77.6857	107.001	47.1188	0.848928	NA
TS12-RHY-1-12	676.621	14799.2	1.50447	21.7525	11.1467	0.0466869	11.3096	0.0073655	1.91257	0.169111	47.307	0.901469	46.3318	5.12221	-3.83738	269.561	47.307	0.901469	NA
TS12-RHY-1-13	911.418	29278	1.29602	21.615	6.40679	0.0472936	7.03319	0.00741405	2.90151	0.412545	47.6178	1.37654	46.9202	3.22491	11.4354	154.207	47.6178	1.37654	NA
TS12-RHY-1-14	840.524	42788.9	1.39302	20.8632	3.22557	0.0490486	3.96331	0.00742175	2.30294	0.581065	47.667	1.0937	48.6203	1.88157	95.8946	76.3702	47.667	1.0937	NA
TS12-RHY-1-15	538.946	28079.7	1.43191	22.3909	11.9637	0.0461527	12.3877	0.00749492	3.2133	0.259394	48.1352	1.54097	45.8134	5.54915	-74.0857	293.349	48.1352	1.54097	NA
TS12-RHY-1-16-C	163.42	8326.13	0.750249	21.7317	13.4404	0.095922	14.1144	0.0151186	4.30933	0.305315	96.7312	4.13735	93.005	12.5445	-1.5367	325.294	96.7312	4.13735	NA
TS12-RHY-1-16-R	163.864	6345.44	0.832967	20.2877	14.6879	0.101406	14.9555	0.014921	2.81604	0.188295	95.4763	2.66884	98.0738	13.9822	161.716	345.074	95.4763	2.66884	NA
TS12-RHY-1-17	983.863	26496.8	1.26068	21.631	5.5944	0.0471705	6.00229	0.00740026	2.17489	0.362344	47.5295	1.02991	46.8008	2.74537	9.64699	134.692	47.5295	1.02991	NA
TS12-RHY-1-18	683.119	16691.1	1.45241	22.3066	12.9351	0.0457482	13.0552	0.00740127	1.76646	0.135308	47.536	0.836617	45.4207	5.79914	-64.8742	316.781	47.536	0.836617	NA
TS12-RHY-1-19	447.496	19973.3	1.71509	22.2409	14.2544	0.0461289	14.7478	0.00744087	3.78281	0.256499	47.7893	1.80109	45.7903	6.60317	-57.6747	348.862	47.7893	1.80109	NA
TS12-RHY-1-20	689.599	35021.9	1.4163	21.0926	4.72537	0.0485569	5.39391	0.00742813	2.60098	0.482207	47.7079	1.23629	48.1443	2.53626	69.9483	112.439	47.7079	1.23629	NA
TS12-RHY-1-21	537.524	28483.7	1.42907	22.4011	5.98059	0.0452363	6.5747	0.00734944	2.73116	0.415404	47.2043	1.28451	44.9236	2.88921	-75.1949	146.333	47.2043	1.28451	NA
TS12-RHY-1-22	118.232	3919.16	0.658229	16.6344	27.5152	0.0596226	28.4727	0.00719311	7.32169	0.257148	46.2038	3.37081	58.8037	16.2688	607.746	605.595	46.2038	3.37081	NA
TS12-RHY-1-23	721.831	19514.2	1.19742	20.3198	5.78351	0.0494357	7.18569	0.00728551	4.26441	0.593459	46.7951	1.98831	48.9949	3.43704	158.002	135.439	46.7951	1.98831	NA
TS12-RHY-1-24	841.664	21414.8	1.40785	20.9896	6.88641	0.0483974	7.04706	0.00736758	1.49616	0.21231	47.3203	0.705395	47.9897	3.3032	81.5369	163.607	47.3203	0.705395	NA
TS12-RHY-1-25	346.1	14686	1.47809	22.9762	9.85824	0.0440501	10.3288	0.00734046	3.08202	0.298392	47.1468	1.44777	43.7706	4.42494	-137.559	244.476	47.1468	1.44777	NA
Sample TS12-SCS7-Z1: Lower Sage Creek member; pedogenically altered fluvial sandstone
TS12-SCS7-Z1-2	626.409	18120.8	1.65593	21.3138	6.38831	0.0535846	7.45973	0.00828323	3.85189	0.516358	53.1772	2.0399	53.0012	3.85235	45.0305	152.809	53.1772	2.0399	NA
TS12-SCS7-Z1-3	556.404	253756	1.77694	6.49705	1.33745	9.04621	3.30464	0.426266	3.0219	0.914441	2288.86	58.2225	2342.69	30.2236	2389.88	22.7673	2389.88	22.7673	95.7732
TS12-SCS7-Z1-5	86.6656	5238.06	0.516395	17.1665	32.6392	0.0600763	35.4302	0.00747971	13.7834	0.38903	48.0379	6.59664	59.2384	20.3905	539.264	732.07	48.0379	6.59664	NA
TS12-SCS7-Z1-7	394.318	578710	2.56201	9.52816	0.215677	4.32211	4.92248	0.298678	4.91776	0.99904	1684.75	72.9131	1697.59	40.6123	1713.46	3.96672	1713.46	3.96672	98.3246
TS12-SCS7-Z1-8	73.0915	2238.69	0.837513	34.8787	107.686	0.031396	108.159	0.00794207	10.1127	0.0934978	50.9956	5.13667	31.3887	33.4426	-1300.37	0	50.9956	5.13667	NA
TS12-SCS7-Z1-9	63.3022	2158.94	0.708715	11.6818	170.748	0.0884608	171.099	0.0074948	10.9551	0.0640277	48.1344	5.25353	86.0685	142.115	1329.22	500.214	48.1344	5.25353	NA
TS12-SCS7-Z1-10	841.797	25323.1	1.38565	21.7279	2.97089	0.046295	3.6606	0.00729542	2.13864	0.584232	46.8586	0.998503	45.9516	1.64461	-1.11127	71.6304	46.8586	0.998503	NA
TS12-SCS7-Z1-11	280.313	275528	2.88193	7.01308	0.228499	7.49809	1.82183	0.381381	1.80744	0.992103	2082.73	32.1686	2172.76	16.3232	2258.89	3.94389	2258.89	3.94389	92.2013
TS12-SCS7-Z1-12	60.8588	3148.89	0.504574	9.92583	165.869	0.109046	166.109	0.00785008	8.92797	0.0537478	50.4073	4.4828	105.092	167.336	1637.9	246.327	50.4073	4.4828	NA
TS12-SCS7-Z1-13	99.8546	3943.67	0.739026	14.533	36.6244	0.0768452	37.2987	0.00809971	7.06006	0.189284	52.0038	3.65673	75.1745	27.0327	893.006	781.907	52.0038	3.65673	NA
TS12-SCS7-Z1-14	2833.19	37367.5	3.0317	20.8416	1.04453	0.0871114	2.37859	0.0131675	2.13697	0.898419	84.3293	1.79036	84.809	1.93531	98.3491	24.7139	84.3293	1.79036	NA
TS12-SCS7-Z1-15	90.031	4892.49	0.787064	16.869	45.1392	0.0643579	46.5326	0.0078739	11.3022	0.242887	50.5596	5.69199	63.3312	28.577	577.413	1032.1	50.5596	5.69199	NA
TS12-SCS7-Z1-16	289.222	15685.3	1.89579	20.1183	18.6782	0.0588326	19.1405	0.00858437	4.18135	0.218456	55.1022	2.2942	58.0464	10.7992	181.244	438.558	55.1022	2.2942	NA
TS12-SCS7-Z1-18	176.446	8317.07	2.80601	24.155	25.8257	0.0444097	26.2969	0.00778006	4.95579	0.188456	49.9594	2.46631	44.1202	11.3543	-262.924	664.39	49.9594	2.46631	NA
TS12-SCS7-Z1-19	820.018	4905.25	6.2915	20.5953	5.07941	0.0525429	5.36024	0.00784841	1.71224	0.319434	50.3966	0.859549	51.9968	2.717	126.408	119.646	50.3966	0.859549	NA
TS12-SCS7-Z1-20	102.783	5004.67	0.541344	26.3504	33.6601	0.0389039	34.4878	0.00743495	7.51053	0.217773	47.7515	3.57314	38.7533	13.1141	-488.692	915.43	47.7515	3.57314	NA
TS12-SCS7-Z1-21	1253.58	645449	7.58613	7.89185	6.01035	5.20767	9.16656	0.298072	6.9211	0.755038	1681.74	102.459	1853.87	78.2365	2052.85	106.221	2052.85	106.221	81.9224
TS12-SCS7-Z1-22	382.625	379331	2.50389	10.0366	1.2388	3.66275	2.27686	0.266619	1.91036	0.839032	1523.62	25.9227	1563.29	18.1626	1617.27	23.0643	1617.27	23.0643	94.209
TS12-SCS7-Z1-23	80.8338	52830.5	1.06248	5.23293	0.320469	14.0435	2.76972	0.532989	2.75112	0.993284	2754.03	61.6624	2752.65	26.2597	2751.62	5.26679	2751.62	5.26679	100.088
TS12-SCS7-Z1-24	729.899	67871.1	8.78862	5.96362	0.459007	10.2989	1.86258	0.445449	1.80514	0.969159	2374.99	35.8615	2462	17.2402	2534.64	7.70102	2534.64	7.70102	93.7011
TS12-SCS7-Z1-25	35.4315	1532.14	0.76357	14.1034	128.792	0.075608	129.192	0.00773374	10.1676	0.0787015	49.6631	5.03016	74.0073	92.4653	954.658	530.065	49.6631	5.03016	NA
TS12-SCS7-Z1-26	227.732	11062.4	1.5225	21.3128	32.8023	0.0525604	33.5744	0.00812453	7.15904	0.213229	52.1625	3.71927	52.0137	17.0251	45.14	802.861	52.1625	3.71927	NA
TS12-SCS7-Z1-29	199.554	490814	3.53324	6.26098	0.529028	9.74531	2.26672	0.442524	2.20412	0.972383	2361.93	43.5886	2411	20.8769	2452.68	8.94869	2452.68	8.94869	96.3
TS12-SCS7-Z1-31	62.6624	2522.59	1.18634	25.8141	58.4696	0.0416273	60.1212	0.00779352	13.9954	0.232786	50.0455	6.97693	41.4116	24.401	-434.384	1666.22	50.0455	6.97693	NA
TS12-SCS7-Z1-32	866.593	17808.2	1.361	21.5612	6.08583	0.0462938	6.15054	0.00723925	0.889821	0.144674	46.4991	0.41227	45.9504	2.76321	17.3814	146.302	46.4991	0.41227	NA
TS12-SCS7-Z1-33	308.496	19400.8	1.899	22.1372	10.9375	0.048116	11.0368	0.00772523	1.47681	0.133808	49.6086	0.729813	47.7172	5.14466	-46.3024	266.649	49.6086	0.729813	NA
TS12-SCS7-Z1-34	154.233	58006.4	1.39801	17.5626	2.80667	0.570926	6.01342	0.0727224	5.31826	0.884397	452.536	23.2418	458.613	22.1945	489.17	61.9349	452.536	23.2418	92.5111
TS12-SCS7-Z1-35	129.961	6975.39	96.7486	21.33	32.5107	0.053433	32.7632	0.00826606	4.05981	0.123914	53.0674	2.1456	52.8551	16.8756	43.2168	795.637	53.0674	2.1456	NA
TS12-SCS7-Z1-36	2518.48	771636	22.2903	6.57688	0.189109	8.08997	7.20644	0.385892	7.20396	0.999656	2103.75	129.326	2241.13	65.2127	2369.07	3.22632	2369.07	3.22632	88.8006
TS12-SCS7-Z1-37	450.046	617.771	0.911681	15.1941	36.2237	0.0646869	37.1157	0.00712837	8.08836	0.217923	45.7894	3.69049	63.645	22.9011	800.478	783.865	45.7894	3.69049	NA
TS12-SCS7-Z1-38	2832.44	52139.8	1.58432	20.9059	1.58924	0.0854417	2.20956	0.012955	1.53508	0.694743	82.9769	1.2656	83.2482	1.76604	91.0453	37.6586	82.9769	1.2656	NA
TS12-SCS7-Z1-39	556.33	13272.2	7.52114	20.4486	6.47082	0.0516446	6.61898	0.00765926	1.39263	0.210399	49.1867	0.68238	51.1298	3.30049	143.187	151.959	49.1867	0.68238	NA
TS12-SCS7-Z1-41	614.326	326914	22.5174	6.80874	1.20009	7.35149	2.51832	0.363029	2.21399	0.879152	1996.51	38.0132	2155.09	22.5125	2309.78	20.6001	2309.78	20.6001	86.4372
TS12-SCS7-Z1-42	243.819	5875.73	5.04003	21.5383	9.60958	0.0499811	10.4376	0.00780757	4.07427	0.390345	50.1353	2.03473	49.5224	5.04497	19.9723	231.195	50.1353	2.03473	NA
TS12-SCS7-Z1-44	77.2788	2406.65	0.62023	18.9353	23.6845	0.0547648	24.7173	0.00752093	7.07035	0.286048	48.3016	3.40233	54.138	13.0317	320.73	544.934	48.3016	3.40233	NA
TS12-SCS7-Z1-46	106.643	7835.51	0.586186	30.5913	75.0942	0.0349092	75.526	0.00774527	8.06479	0.106782	49.7369	3.99574	34.8416	25.8737	-902.652	2532.39	49.7369	3.99574	NA
TS12-SCS7-Z1-47	553.844	7608.25	11.7118	20.1055	7.97355	0.0534741	8.4821	0.00779752	2.89284	0.341052	50.0711	1.44286	52.8947	4.37175	182.733	185.989	50.0711	1.44286	NA
TS12-SCS7-Z1-48	78.017	3295.09	0.873696	13.2732	97.2559	0.0775523	97.5603	0.00746568	7.70034	0.078929	47.9481	3.67847	75.841	71.4125	1077.58	#VALUE!	47.9481	3.67847	NA
TS12-SCS7-Z1-49	807.276	17210.6	7.31986	21.0307	4.43627	0.0517304	4.63056	0.00789038	1.32723	0.286625	50.665	0.669806	51.2127	2.31263	76.896	105.414	50.665	0.669806	NA
TS12-SCS7-Z1-50	96.7116	125447	2.57976	5.61774	0.5502	11.9723	2.71806	0.487794	2.66179	0.979298	2561.13	56.2597	2602.24	25.4766	2634.38	9.13887	2634.38	9.13887	97.2192
TS12-SCS7-Z1-51	96.0347	268758	2.12592	6.17737	0.622306	10.6154	1.67635	0.475596	1.55656	0.928542	2508.06	32.3413	2490.06	15.5571	2475.39	10.4999	2475.39	10.4999	101.32
TS12-SCS7-Z1-53	286.902	205511	0.811141	10.823	0.250984	3.29201	2.1179	0.258409	2.10298	0.992953	1481.7	27.8383	1479.16	16.4959	1475.51	4.76111	1475.51	4.76111	100.419
TS12-SCS7-Z1-54	365.318	18045.5	1.57494	22.9492	10.0247	0.0479577	10.4668	0.00798222	3.01008	0.287583	51.2524	1.53662	47.5638	4.86365	-134.647	248.494	51.2524	1.53662	NA
TS12-SCS7-Z1-55	134.566	120823	1.76672	10.7624	0.719939	3.24934	1.68487	0.253632	1.52331	0.904112	1457.18	19.8675	1469.02	13.0826	1486.15	13.6378	1486.15	13.6378	98.0504
TS12-SCS7-Z1-57	92.0614	159717	1.91877	5.75432	1.6084	10.1872	4.07825	0.425156	3.74769	0.918945	2283.84	72.0752	2451.92	37.7257	2594.4	26.8269	2594.4	26.8269	88.0298
TS12-SCS7-Z1-58	661.281	12018.5	9.79023	22.053	4.99591	0.0480981	5.37401	0.00769295	1.98012	0.368463	49.4022	0.974486	47.6998	2.50412	-37.0382	121.34	49.4022	0.974486	NA
TS12-SCS7-Z1-59	562.146	29086.1	7.16559	20.8224	8.93725	0.0505663	8.99529	0.00763645	1.02015	0.113409	49.0407	0.498388	50.0882	4.39628	100.505	211.728	49.0407	0.498388	NA
TS12-SCS7-Z1-61	1244.44	437164	1.3347	6.29152	0.122404	9.61601	1.89311	0.438782	1.88915	0.997908	2345.19	37.1401	2398.7	17.4133	2444.45	2.07224	2444.45	2.07224	95.9394
TS12-SCS7-Z1-62	218.735	321527	0.696441	6.24763	0.549421	8.32153	2.22499	0.377066	2.15609	0.969033	2062.56	38.0586	2266.67	20.1712	2456.29	9.29023	2456.29	9.29023	83.9708
TS12-SCS7-Z1-63	128.12	232436	3.03399	9.54696	0.533461	4.45456	1.00991	0.308438	0.857523	0.849105	1733.02	13.0311	1722.55	8.3747	1709.83	9.81419	1709.83	9.81419	101.356
TS12-SCS7-Z1-64	609.407	16413.9	5.63022	10.1224	2.54617	0.592598	12.7591	0.0435053	12.5025	0.979886	274.524	33.6021	472.525	48.2426	1601.4	47.5089	274.524	33.6021	NA
TS12-SCS7-Z1-65	521.581	34144.7	2.23125	21.4175	11.423	0.0528526	11.6673	0.00820984	2.37488	0.20355	52.7079	1.24665	52.2955	5.94709	33.4609	274.34	52.7079	1.24665	NA
TS12-SCS7-Z1-66	220.638	7598.38	2.35568	20.0888	18.6532	0.0550412	19.526	0.00801938	5.77254	0.295633	51.4901	2.96045	54.4041	10.3437	184.663	437.69	51.4901	2.96045	NA
TS12-SCS7-Z1-67	1008.08	28618.3	6.11772	21.9981	4.42142	0.0484563	4.77835	0.00773099	1.81209	0.379229	49.6455	0.896166	48.0468	2.24238	-30.9975	107.228	49.6455	0.896166	NA
TS12-SCS7-Z1-68	490.027	968676	2.5023	6.75766	0.318083	7.05473	1.32076	0.345761	1.28189	0.970567	1914.32	21.2314	2118.35	11.7464	2322.7	5.45311	2322.7	5.45311	82.418
TS12-SCS7-Z1-69	35.2878	1329.86	1.32033	5.50412	396.682	0.194589	397.204	0.00776792	20.3674	0.051277	49.8818	10.1204	180.537	781.992	2668.27	293.714	49.8818	10.1204	NA
TS12-SCS7-Z1-70	1017.92	46037.5	3.83528	20.6843	6.36119	0.0505379	6.4681	0.00758154	1.17116	0.181067	48.6894	0.568082	50.0607	3.15946	116.221	150.127	48.6894	0.568082	NA
TS12-SCS7-Z1-72	1041.51	35332.6	9.08517	21.3524	5.74004	0.0501758	6.24935	0.00777031	2.47109	0.395416	49.897	1.22824	49.7107	3.03178	40.7547	137.37	49.897	1.22824	NA
TS12-SCS7-Z1-73	811.58	118869	3.80974	6.05151	0.144133	9.1894	1.73408	0.40332	1.72808	0.99654	2184.31	32.0169	2357.06	15.8809	2510.06	2.42119	2510.06	2.42119	87.022
TS12-SCS7-Z1-74	113.573	214390	1.86009	6.46929	1.08649	9.04188	1.76512	0.424242	1.39112	0.788113	2279.71	26.7125	2342.25	16.1393	2397.17	18.4806	2397.17	18.4806	95.1002
TS12-SCS7-Z1-75	228.198	449118	4.64578	6.1562	0.896807	8.90367	2.23055	0.39754	2.04233	0.915615	2157.7	37.4512	2328.18	20.3645	2481.18	15.124	2481.18	15.124	86.9628
TS12-SCS7-Z1-76	92.9221	183217	2.38229	9.41502	0.47952	4.55084	1.18997	0.310751	1.08907	0.915213	1744.4	16.6444	1740.32	9.90629	1735.4	8.79328	1735.4	8.79328	100.519
TS12-SCS7-Z1-77	49.255	2676.98	0.683769	13.1652	88.7129	0.0832989	89.2041	0.00795366	9.34835	0.104797	51.0697	4.75532	81.2418	69.7571	1093.97	167.425	51.0697	4.75532	NA
TS12-SCS7-Z1-78	993.944	527359	3.92664	9.4395	0.113354	3.56998	1.19152	0.244407	1.18612	0.995465	1409.57	15.0175	1542.88	9.4514	1730.63	2.08029	1730.63	2.08029	81.448
TS12-SCS7-Z1-80	61.2184	4281.68	0.570569	-3.11354	732.026	-0.349389	732.081	0.00788975	8.96864	0.0122509	50.661	4.5258	-436.456	#NUM!	NA	NA	50.661	4.5258	NA
TS12-SCS7-Z1-83	101.273	4935.75	0.620584	20.8381	26.2102	0.0527899	27.2216	0.00797824	7.35115	0.270049	51.2269	3.75085	52.2351	13.8605	98.7366	629.517	51.2269	3.75085	NA
TS12-SCS7-Z1-84	48.3189	1572.14	0.959342	39.493	84.1374	0.0279785	84.9873	0.00801387	11.9888	0.141066	51.4548	6.14428	28.0187	23.491	-1713.99	1225.85	51.4548	6.14428	NA
TS12-SCS7-Z1-85	117.814	148010	1.86179	6.22653	0.263159	9.9616	1.48495	0.449856	1.46145	0.984172	2394.61	29.2316	2431.23	13.7032	2462.01	4.44717	2462.01	4.44717	97.2627
TS12-SCS7-Z1-86	111.79	223750	2.11194	6.36645	0.932549	9.37959	2.97512	0.433092	2.82519	0.949605	2319.64	55.0404	2375.83	27.305	2424.39	15.8174	2424.39	15.8174	95.6795
TS12-SCS7-Z1-87	504.293	835063	11.8578	9.6943	0.380387	4.30058	1.20315	0.302372	1.14144	0.948706	1703.06	17.0836	1693.47	9.91215	1681.6	7.02428	1681.6	7.02428	101.276
TS12-SCS7-Z1-88	399.473	208544	6.87789	9.4017	0.209066	4.32459	1.56178	0.294883	1.54773	0.991	1665.88	22.7213	1698.06	12.8805	1737.99	3.83328	1737.99	3.83328	95.8511
TS12-SCS7-Z1-89	75.438	2287.71	0.691505	13.918	113.552	0.0775472	113.723	0.00782782	6.23965	0.0548671	50.2649	3.12416	75.8363	83.2877	981.703	409.887	50.2649	3.12416	NA
TS12-SCS7-Z1-90	252.454	286973	2.04865	5.62111	0.81118	12.1295	1.76358	0.494496	1.56595	0.887939	2590.1	33.4017	2614.47	16.5447	2633.39	13.4768	2633.39	13.4768	98.3561
TS12-SCS7-Z1-91	77.9104	172953	1.8215	6.24553	0.376413	10.4035	1.61152	0.471247	1.56694	0.972338	2489.03	32.3547	2471.36	14.9292	2456.86	6.36442	2456.86	6.36442	101.309
TS12-SCS7-Z1-92	101.55	249374	1.63555	5.32579	0.203011	13.4319	2.04129	0.518824	2.03116	0.995042	2694.19	44.7284	2710.5	19.293	2722.68	3.34526	2722.68	3.34526	98.9538
TS12-SCS7-Z1-93	433.319	18452.4	1.74796	21.6753	18.032	0.0499257	18.122	0.00784851	1.80411	0.0995538	50.3972	0.905679	49.4688	8.75008	4.71408	437.27	50.3972	0.905679	NA
TS12-SCS7-Z1-94	69.3082	40437.2	1.24488	16.185	5.00915	0.957551	5.16656	0.112402	1.2656	0.24496	686.683	8.24381	682.027	25.6669	666.673	107.296	686.683	8.24381	103.001
TS12-SCS7-Z1-95	79.377	83607.6	1.49576	9.50885	0.591099	4.42844	1.04495	0.305406	0.861698	0.82463	1718.06	12.9959	1717.67	8.65589	1717.19	10.8664	1717.19	10.8664	100.051
TS12-SCS7-Z1-96	78.8313	84.5357	0.61693	7.66099	27.4008	0.143164	28.6841	0.00795457	8.48361	0.29576	51.0756	4.31593	135.858	36.4907	2105.11	490.948	51.0756	4.31593	NA
TS12-SCS7-Z1-97	47.377	154731	1.52213	5.63826	0.519	11.3413	2.54994	0.463773	2.49657	0.979068	2456.2	50.992	2551.61	23.7981	2628.32	8.62868	2628.32	8.62868	93.451
TS12-SCS7-Z1-99	97.0997	4168.97	1.02505	28.8726	53.7954	0.0379281	54.9559	0.00794228	11.2341	0.20442	50.997	5.70645	37.7992	20.3937	-737.879	1606.62	50.997	5.70645	NA
TS12-SCS7-Z1-100	114.417	4569.66	0.491162	24.3685	45.7266	0.0439083	46.0641	0.00776023	5.56619	0.120836	49.8325	2.76308	43.6327	19.6757	-285.306	1221.3	49.8325	2.76308	NA
Sample TS12-SCS2-Z1: Upper Sage Creek member; fluvial sandstone
TS12-SCS2-Z1-1	76.5304	124107	2.39713	6.89009	1.35904	7.19704	4.90023	0.359648	4.708	0.960771	1980.51	80.2839	2136.14	43.7131	2289.38	23.3798	2289.38	23.3798	86.5085
TS12-SCS2-Z1-3	210.656	149508	2.91786	13.1836	0.783133	1.83549	1.64984	0.175502	1.45213	0.880163	1042.36	13.976	1058.25	10.8446	1091.15	15.6757	1091.15	15.6757	95.5283
TS12-SCS2-Z1-4	207.482	7646.52	1.40539	20.9518	16.6002	0.05099	17.4845	0.00774826	5.49017	0.314001	49.756	2.72117	50.4976	8.61352	85.8639	396.046	49.756	2.72117	NA
TS12-SCS2-Z1-5	314.49	7618.82	1.00451	22.212	18.6374	0.0458057	18.8291	0.00737916	2.67954	0.142309	47.3945	1.2653	45.4766	8.37408	-54.5153	457.267	47.3945	1.2653	NA
TS12-SCS2-Z1-6	78.1121	123443	0.957357	9.8591	0.682332	4.10594	1.77511	0.293595	1.63873	0.923171	1659.47	23.976	1655.48	14.4951	1650.42	12.6486	1650.42	12.6486	100.548
TS12-SCS2-Z1-7	144.096	184435	2.5885	9.12351	0.335561	4.79865	1.33161	0.317526	1.28864	0.967728	1777.64	20.0203	1784.66	11.1897	1792.87	6.11094	1792.87	6.11094	99.1503
TS12-SCS2-Z1-8	276.62	346203	0.812713	8.45722	0.201978	5.60137	1.9867	0.343574	1.97641	0.994819	1903.84	32.5805	1916.31	17.1184	1929.81	3.61598	1929.81	3.61598	98.6543
TS12-SCS2-Z1-9	150.339	3539.56	1.44017	20.612	28.8708	0.0497574	30.2014	0.00743835	8.86565	0.293551	47.7733	4.21976	49.3061	14.5363	124.456	692.467	47.7733	4.21976	NA
TS12-SCS2-Z1-10	50.784	52336.9	0.601797	13.0997	2.32452	1.80244	3.41507	0.171245	2.50185	0.732593	1018.97	23.5805	1046.34	22.3061	1103.95	46.4808	1103.95	46.4808	92.3017
TS12-SCS2-Z1-11	27.2417	62597.2	0.903827	6.19806	1.01022	10.5081	1.71275	0.472365	1.3831	0.807531	2493.92	28.6047	2480.63	15.8811	2469.74	17.0566	2469.74	17.0566	100.979
TS12-SCS2-Z1-12	139.329	6095.46	1.7221	8.94467	2.30796	4.70003	3.20362	0.304904	2.22183	0.693537	1715.58	33.4671	1767.24	26.8285	1828.84	41.8475	1828.84	41.8475	93.8071
TS12-SCS2-Z1-13	611.923	148939	8.61773	8.66111	0.110311	5.16338	1.47598	0.324345	1.47185	0.997203	1810.91	23.2376	1846.6	12.5559	1887.04	1.98602	1887.04	1.98602	95.9659
TS12-SCS2-Z1-14	235.629	702786	1.80765	5.20212	0.151438	13.951	1.47912	0.526362	1.47135	0.994745	2726.11	32.7088	2746.39	14.0151	2761.32	2.48658	2761.32	2.48658	98.7249
TS12-SCS2-Z1-15	23.8873	47467.4	0.460332	8.45504	2.13479	5.60663	2.54151	0.343808	1.3791	0.542631	1904.96	22.7455	1917.12	21.9033	1930.27	38.238	1930.27	38.238	98.6888
TS12-SCS2-Z1-16	39.6908	74660.2	0.761688	8.61512	1.58479	5.31867	2.55155	0.332325	1.99971	0.783723	1849.64	32.1545	1871.87	21.8111	1896.61	28.4998	1896.61	28.4998	97.5233
TS12-SCS2-Z1-17	370.491	9238.56	4.38606	9.25032	0.877294	4.25726	1.40778	0.285618	1.101	0.782081	1619.59	15.7681	1685.14	11.5759	1767.7	16.0246	1767.7	16.0246	91.6217
TS12-SCS2-Z1-18	124.912	161294	1.54444	9.49061	0.557117	4.49821	4.40456	0.309623	4.36918	0.991968	1738.85	66.5918	1730.64	36.6049	1720.72	10.2372	1720.72	10.2372	101.054
TS12-SCS2-Z1-19	119.519	300.953	1.2975	13.5054	34.434	0.0802264	34.967	0.00785822	6.08196	0.173934	50.4593	3.05693	78.3577	26.3747	1042.66	715.851	50.4593	3.05693	NA
TS12-SCS2-Z1-19	71.3751	71893.2	0.616001	10.0022	1.29172	3.96198	1.9717	0.287412	1.48965	0.755515	1628.58	21.4383	1626.45	15.9869	1623.66	24.0299	1623.66	24.0299	100.303
TS12-SCS2-Z1-20	223.633	11032.7	1.02708	5.67542	0.665312	9.33291	4.70035	0.384161	4.65302	0.989932	2095.69	83.2539	2371.26	43.1336	2617.4	11.073	2617.4	11.073	80.0679
TS12-SCS2-Z1-21	67.4005	69513	2.64498	13.0334	1.78519	2.01547	2.33834	0.190517	1.51028	0.645875	1124.18	15.5803	1120.74	15.8707	1114.05	35.6342	1114.05	35.6342	100.909
TS12-SCS2-Z1-22	190.832	352256	4.54691	9.75918	0.258703	4.14963	1.46426	0.293712	1.44123	0.984269	1660.05	21.0929	1664.14	11.9813	1669.28	4.78476	1669.28	4.78476	99.4473
TS12-SCS2-Z1-23	252.018	280057	1.93249	9.55604	0.412129	4.16243	2.05102	0.288485	2.00919	0.979604	1633.95	28.9992	1666.66	16.7932	1708.08	7.58327	1708.08	7.58327	95.6601
TS12-SCS2-Z1-24	140.786	79186.9	2.44568	10.986	0.670253	3.15618	2.19712	0.251477	2.09239	0.952333	1446.09	27.1044	1446.51	16.9431	1447.11	12.7634	1447.11	12.7634	99.9296
Sample TS12-SCS6-Z1: Lower Dell member; fluvial-alluvial sandstone
TS12-SCS6-Z1-1	87.449	160197	1.24532	9.85007	0.462315	4.06109	3.81486	0.290122	3.78675	0.99263	1642.14	54.8966	1646.53	31.0916	1652.12	8.56933	1652.12	8.56933	99.3962
TS12-SCS6-Z1-2	210.354	151946	2.07849	11.4359	0.363172	2.86953	2.22172	0.238001	2.19183	0.986549	1376.3	27.1635	1373.95	16.7306	1370.28	6.98968	1370.28	6.98968	100.439
TS12-SCS6-Z1-3	474.844	11637.2	1.26134	20.017	8.03781	0.0506623	8.67871	0.007355	3.27316	0.377148	47.2399	1.54058	50.181	4.24922	193.041	187.153	47.2399	1.54058	NA
TS12-SCS6-Z1-4	16.6892	14214.9	0.956863	13.6416	9.85722	1.80631	10.1311	0.178713	2.33975	0.230947	1059.94	22.8685	1047.74	66.3071	1022.38	199.947	1022.38	199.947	103.674
TS12-SCS6-Z1-5	228.228	9377.08	2.50813	24.9491	14.9308	0.0414116	15.5284	0.00749335	4.26616	0.274733	48.1252	2.04545	41.2013	6.26991	-345.673	386.877	48.1252	2.04545	NA
TS12-SCS6-Z1-6	271.766	10792.2	1.01535	23.5063	20.911	0.0436115	21.2499	0.00743505	3.78031	0.177898	47.7521	1.79851	43.344	9.01698	-194.329	528.129	47.7521	1.79851	NA
TS12-SCS6-Z1-7	225.237	14972.3	1.8783	24.5231	52.7992	0.0415251	52.9489	0.00738559	3.97947	0.0751568	47.4356	1.88076	41.312	21.4384	-301.447	1440.53	47.4356	1.88076	NA
TS12-SCS6-Z1-9	259.217	9002.03	1.38289	21.6646	10.5539	0.0477448	10.7786	0.00750198	2.18954	0.203137	48.1804	1.051	47.3575	4.98733	5.88342	254.684	48.1804	1.051	NA
TS12-SCS6-Z1-10	78.9738	9835.27	1.27495	6.02302	377.736	0.167925	377.892	0.00733548	10.8781	0.0287863	47.115	5.10654	157.617	618.244	2518	364.163	47.115	5.10654	NA
TS12-SCS6-Z1-11	84.5476	290081	1.8291	4.99055	0.270166	14.9027	0.968858	0.539401	0.930428	0.960335	2780.94	21.0166	2809.05	9.21926	2829.28	4.40503	2829.28	4.40503	98.2916
TS12-SCS6-Z1-12	198.537	3863.61	0.939531	19.9683	11.9791	0.0520698	12.9018	0.00754094	4.79139	0.371373	48.4297	2.31176	51.5403	6.48378	198.677	279.103	48.4297	2.31176	NA
TS12-SCS6-Z1-13	24.5368	64252.1	0.731677	5.43346	1.08328	12.8081	1.86209	0.504733	1.51455	0.813362	2634.1	32.7497	2665.64	17.5398	2689.64	17.9032	2689.64	17.9032	97.935
TS12-SCS6-Z1-14	76.0578	50058.8	0.62051	10.5894	1.23993	3.49775	2.13365	0.268633	1.73638	0.813809	1533.86	23.7022	1526.71	16.8495	1516.8	23.3914	1516.8	23.3914	101.125
TS12-SCS6-Z1-15	925.748	25102.4	1.23493	21.2362	3.2805	0.048086	3.92866	0.00740619	2.16163	0.550222	47.5675	1.02445	47.6881	1.83019	53.7422	78.27	47.5675	1.02445	NA
TS12-SCS6-Z1-16	115.29	4980.71	2.70205	16.1913	16.3317	0.0678271	16.8832	0.00796498	4.27976	0.253492	51.1422	2.1801	66.6354	10.8894	665.841	351.875	51.1422	2.1801	NA
TS12-SCS6-Z1-17	468.386	32749.6	1.75497	22.0223	11.2412	0.0486331	11.4849	0.00776773	2.35346	0.204917	49.8805	1.16939	48.218	5.40843	-33.6654	273.415	49.8805	1.16939	NA
TS12-SCS6-Z1-19	77.4148	44659.9	2.38928	9.64938	0.84367	4.03553	4.85344	0.282422	4.77955	0.984776	1603.55	67.8561	1641.39	39.5143	1690.18	15.5609	1690.18	15.5609	94.8748
TS12-SCS6-Z1-20	605.858	25560.4	1.0934	20.1617	8.14387	0.052253	8.31051	0.00764076	1.65588	0.199251	49.0683	0.809428	51.7171	4.19036	176.226	190.193	49.0683	0.809428	NA
TS12-SCS6-Z1-21	149.604	6373.26	1.16191	29.2155	35.9852	0.0360293	36.8294	0.00763428	7.84019	0.212878	49.0268	3.82922	35.9399	13.0057	-771.054	1041.83	49.0268	3.82922	NA
TS12-SCS6-Z1-22	370.639	8111.94	0.775368	22.5957	13.9451	0.0450895	14.2894	0.00738923	3.11804	0.218206	47.4589	1.47435	44.7809	6.25995	-96.3896	343.799	47.4589	1.47435	NA
TS12-SCS6-Z1-24	100.028	131252	2.20488	9.87562	0.317104	4.11125	1.7228	0.294467	1.69337	0.982914	1663.81	24.8323	1656.54	14.0715	1647.31	5.88135	1647.31	5.88135	101.002
TS12-SCS6-Z1-25	194.73	11591.9	0.999017	25.4926	25.4257	0.0410854	25.7617	0.00759627	4.14716	0.160982	48.7837	2.0155	40.8832	10.3233	-401.58	672.218	48.7837	2.0155	NA
TS12-SCS6-Z1-26	325.614	86029.7	1.46106	17.7691	1.68329	0.524029	2.14967	0.0675337	1.33702	0.621965	421.28	5.4525	427.839	7.50537	463.349	37.3262	421.28	5.4525	90.9207
TS12-SCS6-Z1-27	348.167	4174.02	1.73269	20.9149	12.7842	0.050081	13.1649	0.00759675	3.14283	0.238728	48.7867	1.52749	49.619	6.37533	90.0385	304.01	48.7867	1.52749	NA
TS12-SCS6-Z1-28	2527.6	85794.9	1.00178	20.9012	1.48971	0.0495289	2.19325	0.00750807	1.60969	0.733928	48.2194	0.773284	49.085	1.05095	91.5456	35.3195	48.2194	0.773284	NA
TS12-SCS6-Z1-29	50.5648	1217.39	1.60833	12.1723	96.8647	0.0857036	97.5414	0.0075661	11.4694	0.117585	48.5906	5.55212	83.4932	78.337	1249.16	#VALUE!	48.5906	5.55212	NA
TS12-SCS6-Z1-30	1150.93	40640.6	2.2724	21.3142	3.47678	0.0469692	3.66734	0.00726076	1.16677	0.318153	46.6368	0.542183	46.6056	1.67056	44.9799	83.1159	46.6368	0.542183	NA
TS12-SCS6-Z1-31	102.079	135795	2.61332	8.87549	0.342009	5.17521	1.3679	0.333134	1.32446	0.968239	1853.55	21.3355	1848.55	11.6407	1842.9	6.19036	1842.9	6.19036	100.578
TS12-SCS6-Z1-32	93.921	35230.1	3.10135	6.77938	0.570643	7.0463	7.36025	0.346458	7.33809	0.99699	1917.66	121.734	2117.29	65.5375	2317.2	9.78869	2317.2	9.78869	82.7577
TS12-SCS6-Z1-33	64.7274	94774	3.55622	9.15215	0.600727	4.80792	1.24027	0.319138	1.08507	0.874872	1785.52	16.9226	1786.28	10.4255	1787.16	10.9458	1787.16	10.9458	99.9082
TS12-SCS6-Z1-34	71.4954	2646.23	1.64981	19.5143	39.0681	0.0543296	40.3252	0.00768934	9.99003	0.247737	49.3791	4.91414	53.719	21.1023	251.86	931.231	49.3791	4.91414	NA
TS12-SCS6-Z1-35	45.7738	88061.3	1.81084	12.4105	2.07068	2.2398	3.06174	0.201604	2.25533	0.736617	1183.93	24.3931	1193.6	21.4958	1211.14	40.7408	1211.14	40.7408	97.7531
TS12-SCS6-Z1-36	140.813	311013	1.3214	9.43556	0.84474	4.52242	2.33117	0.309483	2.17273	0.932035	1738.16	33.1029	1735.1	19.3864	1731.4	15.4999	1731.4	15.4999	100.391
TS12-SCS6-Z1-37	168.579	6666.19	0.932466	24.7977	38.8486	0.0423363	39.0436	0.00761418	3.89717	0.0998159	48.8982	1.89844	42.1024	16.1035	-330	1032.1	48.8982	1.89844	NA
TS12-SCS6-Z1-38	99.8712	89608.8	1.59882	11.3317	0.591204	2.91549	2.13693	0.239609	2.05352	0.960968	1384.67	25.5881	1385.94	16.1578	1387.88	11.3489	1387.88	11.3489	99.7685
TS12-SCS6-Z1-39	61.286	27836.2	1.78145	9.15065	0.960484	4.02403	2.28593	0.267062	2.07436	0.907445	1525.87	28.1851	1639.06	18.5931	1787.46	17.5016	1787.46	17.5016	85.3655
TS12-SCS6-Z1-40	390.168	13986.4	1.77217	19.4754	10.0988	0.0545253	10.5766	0.00770163	3.14296	0.297163	49.4577	1.54849	53.9074	5.5529	256.455	232.642	49.4577	1.54849	NA
TS12-SCS6-Z1-41	65.4402	2160.88	0.680989	16.3251	102.12	0.0639711	102.451	0.00757422	8.22666	0.0802982	48.6426	3.9866	62.9621	62.6255	648.235	563.884	48.6426	3.9866	NA
TS12-SCS6-Z1-42	173.129	8234.13	1.91409	19.0715	10.1231	0.0531473	10.9273	0.00735131	4.1146	0.376542	47.2162	1.93566	52.5797	5.5994	304.376	231.218	47.2162	1.93566	NA
TS12-SCS6-Z1-43	227.533	180250	2.62344	9.28051	0.568979	1.40696	5.21438	0.0947003	5.18324	0.994029	583.276	28.9054	891.875	30.9585	1761.74	10.4017	1761.74	10.4017	33.1079
TS12-SCS6-Z1-44	65.4472	2517.74	1.42973	1.16078	2048.86	0.857733	2048.89	0.00722108	11.0338	0.00538527	46.3828	5.09943	628.884	#NUM!	NA	NA	46.3828	5.09943	NA
TS12-SCS6-Z1-45	28.2682	44061.5	0.880739	8.95057	1.06196	5.11719	1.5401	0.332186	1.11542	0.724251	1848.97	17.9297	1838.96	13.0823	1827.64	19.2558	1827.64	19.2558	101.167
TS12-SCS6-Z1-47	368.619	6308.9	2.20759	20.1848	6.44885	0.0529298	9.26667	0.0077486	6.65459	0.718121	49.7581	3.29845	52.37	4.72996	173.553	150.623	49.7581	3.29845	NA
TS12-SCS6-Z1-49	74.3586	50183.7	2.22323	13.7879	2.58258	1.63169	2.75798	0.163168	0.967853	0.350928	974.356	8.75225	982.51	17.3646	1000.76	52.4491	1000.76	52.4491	97.362
TS12-SCS6-Z1-50	432.258	9270.01	2.38898	9.16148	0.190457	4.39117	1.00607	0.291773	0.987878	0.981918	1650.38	14.384	1710.68	8.3208	1785.3	3.47167	1785.3	3.47167	92.4426
TS12-SCS6-Z1-51	201.06	7200.86	1.24056	25.4664	35.782	0.0400334	36.11	0.00739417	4.85557	0.134466	47.4905	2.29746	39.8567	14.1143	-398.899	958.741	47.4905	2.29746	NA
TS12-SCS6-Z1-52	166.54	11591.5	1.41892	21.4372	16.5808	0.0778871	17.6141	0.0121097	5.9443	0.337473	77.595	4.58483	76.1565	12.9243	31.2166	399.619	77.595	4.58483	NA
TS12-SCS6-Z1-53	161.546	5291.89	2.0378	18.7396	24.8142	0.0544217	24.8643	0.00739659	1.57725	0.0634341	47.506	0.746533	53.8077	13.0313	344.237	569.284	47.506	0.746533	NA
TS12-SCS6-Z1-54	476.28	11382.3	0.824001	20.8917	8.91389	0.0484565	9.02032	0.00734218	1.38157	0.153162	47.1578	0.64914	48.047	4.23308	92.6463	211.495	47.1578	0.64914	NA
TS12-SCS6-Z1-55	49.8011	51024.1	0.612551	5.39185	0.621754	12.2348	1.41012	0.478445	1.26565	0.897546	2520.49	26.4035	2622.58	13.237	2702.35	10.2652	2702.35	10.2652	93.2705
TS12-SCS6-Z1-57	21.7884	94554.3	1.07775	6.67067	0.823887	8.88132	2.40581	0.429681	2.26034	0.939533	2304.28	43.7931	2325.88	21.9595	2344.88	14.0893	2344.88	14.0893	98.2684
TS12-SCS6-Z1-58	73.5903	18210	1.47287	17.4725	8.89237	0.610411	9.99274	0.0773527	4.55859	0.45619	480.302	21.0993	483.819	38.4776	500.541	196.169	480.302	21.0993	95.9565
TS12-SCS6-Z1-59	201.167	5937.19	1.92116	21.5503	20.8223	0.0481691	21.5296	0.0075287	5.47336	0.254225	48.3513	2.63655	47.7686	10.0466	18.6398	504.781	48.3513	2.63655	NA
TS12-SCS6-Z1-60	394.109	13811.3	1.21419	21.636	8.36502	0.0469361	8.99184	0.00736515	3.29843	0.366825	47.3048	1.5546	46.5735	4.09324	9.1015	201.581	47.3048	1.5546	NA
TS12-SCS6-Z1-61	131.144	8255.49	1.09556	20.2831	32.7713	0.0510546	33.3752	0.00751047	6.32021	0.189368	48.2347	3.03716	50.56	16.4627	162.228	785.027	48.2347	3.03716	NA
TS12-SCS6-Z1-62	940.111	55831.8	1.70627	21.0518	4.71748	0.0497539	5.89623	0.00759653	3.53708	0.599887	48.7853	1.71906	49.3027	2.83756	74.5086	112.154	48.7853	1.71906	NA
TS12-SCS6-Z1-63	133.459	8710.17	1.37069	28.9954	62.7413	0.0366753	62.8786	0.00771263	4.15271	0.0660434	49.5281	2.04888	36.5729	22.591	-749.783	1934.05	49.5281	2.04888	NA
TS12-SCS6-Z1-64	223.161	473073	1.75407	8.11405	0.270696	6.09777	1.57363	0.358845	1.55017	0.985093	1976.7	26.3899	1989.93	13.728	2003.68	4.80508	2003.68	4.80508	98.6534
TS12-SCS6-Z1-66	314.484	18737.4	2.9806	21.5251	6.46349	0.0957508	6.70744	0.0149481	1.79251	0.267242	95.6486	1.70185	92.8464	5.95145	21.4176	155.279	95.6486	1.70185	NA
TS12-SCS6-Z1-67	172.802	3130.05	1.57591	27.0712	36.8612	0.0372659	37.2362	0.00731675	5.27103	0.141557	46.9951	2.46812	37.1511	13.5845	-560.919	1022.58	46.9951	2.46812	NA
TS12-SCS6-Z1-68	853.033	31910.7	1.78839	21.5849	4.437	0.0480597	4.75153	0.00752367	1.70002	0.357784	48.3191	0.818364	47.6626	2.21238	14.7825	106.673	48.3191	0.818364	NA
TS12-SCS6-Z1-69	95.1864	155386	2.07949	9.39128	0.465115	4.60688	0.711837	0.313784	0.538869	0.757012	1759.3	8.29674	1750.51	5.93883	1740.03	8.52415	1740.03	8.52415	101.108
TS12-SCS6-Z1-70	61.5877	3296.11	0.794214	4.75032	427.205	0.21765	427.319	0.0074986	9.86291	0.0230809	48.1587	4.73215	199.952	1020.77	2909.48	177.736	48.1587	4.73215	NA
TS12-SCS6-Z1-71	149.369	527566	2.18091	11.1232	0.47547	3.03502	1.21035	0.244844	1.11305	0.919609	1411.83	14.1127	1416.47	9.24422	1423.44	9.08317	1423.44	9.08317	99.1845
TS12-SCS6-Z1-72	456.271	16386.8	1.16829	21.0382	6.88446	0.049769	7.3811	0.0075939	2.66174	0.360615	48.7685	1.29319	49.3173	3.55319	76.0501	163.723	48.7685	1.29319	NA
TS12-SCS6-Z1-73	53.1679	47953.9	2.31203	11.7439	1.25545	2.74256	1.83679	0.233596	1.34076	0.729949	1353.32	16.3668	1340.07	13.6679	1318.96	24.3349	1318.96	24.3349	102.605
TS12-SCS6-Z1-74	149.214	4195.25	1.09965	25.9443	22.9098	0.039597	23.4544	0.00745082	5.02452	0.214225	47.853	2.39548	39.4305	9.07116	-447.623	609.853	47.853	2.39548	NA
TS12-SCS6-Z1-75	1145.2	36354.1	1.2154	20.6255	7.82654	0.0507147	7.94508	0.00758642	1.36736	0.172101	48.7206	0.663673	50.2316	3.89385	122.914	184.584	48.7206	0.663673	NA
TS12-SCS6-Z1-76	530.309	455184	1.37412	11.3875	0.158271	2.86238	1.02354	0.236404	1.01123	0.987972	1367.98	12.4642	1372.07	7.7022	1378.43	3.0421	1378.43	3.0421	99.2416
TS12-SCS6-Z1-78	82.6669	66585.4	2.25892	12.7717	0.988517	2.06289	1.77207	0.191083	1.47074	0.829954	1127.24	15.2102	1136.58	12.1193	1154.43	19.6354	1154.43	19.6354	97.6445
TS12-SCS6-Z1-79	884.571	32950.4	0.925171	21.7961	5.6373	0.0491349	6.10806	0.00776727	2.35143	0.384973	49.8776	1.16831	48.7038	2.90464	-8.67868	136.184	49.8776	1.16831	NA
TS12-SCS6-Z1-80	167.874	104832	0.600975	17.2174	2.47424	0.705821	2.62946	0.0881373	0.890076	0.338501	544.512	4.64752	542.262	11.0478	532.836	54.2083	544.512	4.64752	102.191
TS12-SCS6-Z1-81	152.78	43509.2	1.62215	18.1272	2.53837	0.542499	3.22058	0.0713229	1.98211	0.615453	444.121	8.50659	440.071	11.5015	418.92	56.7045	444.121	8.50659	106.016
TS12-SCS6-Z1-82	286.336	9125.12	2.7222	17.6211	1.43477	0.597153	3.00329	0.0763164	2.6384	0.878504	474.098	12.0597	475.425	11.4021	481.854	31.7001	474.098	12.0597	98.3904
TS12-SCS6-Z1-83	87.3102	29715.6	1.99701	18.3594	3.39974	0.52432	3.66609	0.0698158	1.37187	0.374204	435.046	5.77131	428.033	12.8049	390.432	76.3222	435.046	5.77131	111.427
TS12-SCS6-Z1-84	165.909	8853.88	1.40047	21.1109	31.3974	0.0498159	31.6948	0.00762735	4.33224	0.136686	48.9825	2.114	49.3626	15.2723	67.884	763.629	48.9825	2.114	NA
TS12-SCS6-Z1-85	291.074	12265.5	0.881494	20.8862	10.5844	0.0496303	11.1034	0.00751804	3.35493	0.302153	48.2831	1.61381	49.1831	5.33091	93.2486	251.279	48.2831	1.61381	NA
TS12-SCS6-Z1-86	167.859	3823.65	0.4473	9.28756	3.31446	4.46492	3.85945	0.300756	1.97729	0.512326	1695.06	29.4721	1724.47	32.0279	1760.35	60.6127	1760.35	60.6127	96.2906
TS12-SCS6-Z1-87	356.677	14040.3	1.04278	20.8416	20.5648	0.048167	20.7985	0.00728082	3.10927	0.149494	46.7651	1.44879	47.7666	9.705	98.3442	491.055	46.7651	1.44879	NA
TS12-SCS6-Z1-88	298.082	7549.8	1.76151	20.9875	8.31091	0.0492321	8.66483	0.0074939	2.45112	0.282882	48.1287	1.1753	48.7978	4.12828	81.7752	197.546	48.1287	1.1753	NA
TS12-SCS6-Z1-89	102.796	96586.1	2.71457	8.75316	0.559045	5.15345	1.86998	0.327161	1.78446	0.954266	1824.61	28.3573	1844.96	15.9031	1867.98	10.0882	1867.98	10.0882	97.6778
TS12-SCS6-Z1-90	125.413	200276	1.07352	8.72273	0.497887	5.37925	0.910032	0.340309	0.761753	0.837061	1888.15	12.4681	1881.56	7.79197	1874.27	8.97774	1874.27	8.97774	100.741
TS12-SCS6-Z1-91	124.255	167195	1.62833	9.38659	0.461988	4.50349	1.00023	0.306588	0.887145	0.886941	1723.9	13.4193	1731.62	8.31094	1740.94	8.46586	1740.94	8.46586	99.0208
TS12-SCS6-Z1-92	230.157	12078.3	1.09722	22.5307	15.5601	0.0456401	16.3293	0.00745798	4.95262	0.303297	47.8988	2.36345	45.3158	7.23717	-89.3296	383.473	47.8988	2.36345	NA
TS12-SCS6-Z1-93	549.06	10503.4	1.14423	21.6047	9.75771	0.0481585	10.2049	0.00754605	2.98787	0.292787	48.4624	1.44256	47.7583	4.76089	12.531	235.101	48.4624	1.44256	NA
TS12-SCS6-Z1-94	17.9716	34238.3	1.24783	6.38688	1.47787	9.58606	2.90784	0.444045	2.50428	0.861217	2368.72	49.6428	2395.83	26.7428	2418.95	25.0833	2418.95	25.0833	97.9236
TS12-SCS6-Z1-95	201.316	15739.4	0.901802	23.4747	21.1427	0.0438589	21.4052	0.00746719	3.34195	0.156128	47.9577	1.59678	43.5847	9.13223	-190.968	533.742	47.9577	1.59678	NA
TS12-SCS6-Z1-96	715.348	32704.1	1.19244	20.8594	6.02717	0.0478317	6.1379	0.00723629	1.16061	0.189089	46.4801	0.537512	47.4418	2.84495	96.3243	142.78	46.4801	0.537512	NA
TS12-SCS6-Z1-97	69.4013	57122.1	1.25313	9.27836	0.808165	4.66531	1.79653	0.313943	1.60449	0.893105	1760.08	24.7133	1761.04	15.0229	1762.17	14.7737	1762.17	14.7737	99.8816
TS12-SCS6-Z1-98	31.3743	50383.8	1.28237	9.11064	1.62823	4.896	2.82448	0.323511	2.30793	0.817117	1806.85	36.3669	1801.57	23.8194	1795.44	29.6407	1795.44	29.6407	100.636
TS12-SCS6-Z1-99	594.112	13755.5	0.895866	21.0944	4.45439	0.0486241	4.71266	0.00743904	1.53869	0.326502	47.7777	0.732434	48.2093	2.21885	69.7501	105.988	47.7777	0.732434	NA
TS12-SCS6-Z1-100	277.449	15156.1	1.64135	23.4239	20.0293	0.0447633	20.4341	0.00760466	4.04724	0.198063	48.8373	1.9691	44.464	8.88997	-185.548	504.614	48.8373	1.9691	NA

## Sheet: (KBR-1) Red Butte Cgl
Appendix II. U/Pb detrital zircon geochronologic analyses by LA-ICP-MS analysis
	Isotope Ratios										Apparent Ages (Ma)
Analysis	U	206Pb	U/Th	206Pb*	± 1σ	207Pb*	± 1σ	206Pb*	± 1σ	error	206Pb*	± 1σ	207Pb*	± 1σ	206Pb*	± 1σ	Best Age	± 1σ	% conc
	(ppm)	204Pb		207Pb*	(%)	235U	(%)	238U	(%)	corr.	238U	(Ma)	235U	(Ma)	207Pb*	(Ma)	(Ma)	(Ma)
Sample TS12-KBR-1: Red Butte Conglomerate; lense of sandstone in fluvial conglomerate
TS12-KBR-1-1	82.2327	16263.7	0.884241	13.2687	1.99258	1.92548	2.75768	0.185297	1.90641	0.69131	1095.85	19.2122	1089.97	18.4316	1078.27	40.0137	1078.27	40.0137	101.63
TS12-KBR-1-2	161.731	393832	1.69443	6.16722	0.217052	10.6697	1.72101	0.477244	1.70726	0.992015	2515.25	35.5559	2494.79	15.9787	2478.16	3.66215	2478.16	3.66215	101.497
TS12-KBR-1-3	195.932	7306.29	2.51537	9.44725	0.446095	4.01873	3.71095	0.275355	3.68404	0.992748	1567.93	51.2759	1637.99	30.1813	1729.13	8.18842	1729.13	8.18842	90.6773
TS12-KBR-1-4	66.7884	11614.8	1.96344	14.0657	2.27277	1.54808	2.57368	0.157927	1.20762	0.469217	945.245	10.6175	949.73	15.8782	960.158	46.445	960.158	46.445	98.4468
TS12-KBR-1-5	39.0073	32026.4	0.416956	10.8588	1.57639	3.26383	4.13853	0.257045	3.82654	0.924614	1474.71	50.442	1472.48	32.1773	1469.25	29.9308	1469.25	29.9308	100.372
TS12-KBR-1-6	45.645	20287.3	1.10792	12.976	5.34034	1.91388	5.74804	0.180117	2.1262	0.369901	1067.61	20.9196	1085.94	38.353	1122.9	106.564	1122.9	106.564	95.0761
TS12-KBR-1-7	328.403	438141	4.40478	9.35383	0.151529	4.03187	3.03276	0.273524	3.02898	0.998751	1558.66	41.9381	1640.65	24.6792	1747.34	2.77511	1747.34	2.77511	89.2019
TS12-KBR-1-8	71.9004	54511.3	1.07496	13.8069	3.61739	1.71874	4.4985	0.172109	2.67413	0.59445	1023.72	25.3127	1015.55	28.884	997.964	73.5083	997.964	73.5083	102.581
TS12-KBR-1-9	160.589	69960	1.2683	4.9493	0.222818	15.3926	1.80631	0.552528	1.79252	0.992363	2835.68	41.1246	2839.85	17.2238	2842.8	3.63184	2842.8	3.63184	99.7493
TS12-KBR-1-10	466.896	9613.93	1.43245	9.11406	0.692919	4.09226	4.33762	0.270504	4.28191	0.987158	1543.36	58.7713	1652.76	35.4087	1794.76	12.616	1794.76	12.616	85.9926
TS12-KBR-1-12	120.288	123121	2.24312	10.7077	0.479913	3.30545	1.88634	0.2567	1.82427	0.967095	1472.94	24.0217	1482.34	14.7059	1495.81	9.0792	1495.81	9.0792	98.471
TS12-KBR-1-13	292.846	428444	3.91913	11.3306	0.391272	2.97057	1.41796	0.244114	1.36291	0.961175	1408.05	17.2393	1400.12	10.7721	1388.05	7.51075	1388.05	7.51075	101.441
TS12-KBR-1-14	215.565	10812	0.809347	15.9747	2.444	0.867087	3.88044	0.10046	3.01408	0.776736	617.106	17.7376	633.985	18.3002	694.623	52.0776	617.106	17.7376	88.8404
TS12-KBR-1-15	38.3707	79030.2	1.4847	6.07907	1.78198	10.2523	2.28449	0.45202	1.42948	0.625735	2404.22	28.687	2457.81	21.1379	2502.42	29.9927	2502.42	29.9927	96.0758
TS12-KBR-1-16	32.8714	90070.5	0.825596	5.90889	0.411053	11.3198	1.87794	0.485113	1.8324	0.975751	2549.5	38.5858	2549.84	17.5223	2550.1	6.88298	2550.1	6.88298	99.9765
TS12-KBR-1-17	228.556	23215	3.73583	5.70628	0.72717	8.76609	3.88641	0.362792	3.81778	0.98234	1995.39	65.5197	2313.97	35.4356	2608.37	12.1101	2608.37	12.1101	76.4997
TS12-KBR-1-18	86.1525	106664	0.896314	9.76663	1.34539	4.21208	4.6585	0.29836	4.46	0.957389	1683.17	66.0714	1676.38	38.2444	1667.87	24.8869	1667.87	24.8869	100.918
TS12-KBR-1-19	79.927	157769	2.76657	9.86275	1.01028	4.17351	1.6173	0.298537	1.26293	0.780887	1684.05	18.7173	1668.83	13.2484	1649.73	18.7308	1649.73	18.7308	102.08
TS12-KBR-1-20	131.454	214042	1.96738	9.53471	0.45664	4.46176	1.3043	0.308541	1.22176	0.936712	1733.52	18.5708	1723.89	10.8193	1712.19	8.39987	1712.19	8.39987	101.246
TS12-KBR-1-21	165.807	36655	1.07339	18.1307	1.91695	0.535062	2.85612	0.0703588	2.11724	0.7413	438.317	8.97176	435.163	10.1088	418.489	42.8164	438.317	8.97176	104.738
TS12-KBR-1-22	31.9762	103931	0.801795	5.26135	0.589606	14.0912	6.48838	0.537707	6.46154	0.995863	2773.84	145.68	2755.87	61.5918	2742.71	9.69463	2742.71	9.69463	101.135
TS12-KBR-1-23	201.764	23298.4	7.56409	8.59959	1.41855	5.53017	3.45012	0.344917	3.145	0.911563	1910.28	51.9957	1905.3	29.6757	1899.86	25.4998	1899.86	25.4998	100.549
TS12-KBR-1-24	320.804	48841.6	2.39887	9.50893	0.291051	4.40867	1.40914	0.304045	1.37876	0.978437	1711.34	20.723	1713.97	11.6633	1717.17	5.3505	1717.17	5.3505	99.6601
TS12-KBR-1-25	408.727	57329	4.64213	10.1439	0.365864	3.19818	5.37332	0.235291	5.36085	0.997679	1362.17	65.8269	1456.72	41.587	1597.45	6.82953	1597.45	6.82953	85.2718
TS12-KBR-1-26	33.8683	51958.4	1.95821	9.93169	0.663562	4.01218	2.2343	0.289003	2.13349	0.954881	1636.54	30.8361	1636.67	18.1623	1636.81	12.3239	1636.81	12.3239	99.984
TS12-KBR-1-27	98.6368	343579	4.20186	7.56327	3.70646	6.46014	3.87649	0.354364	1.13548	0.292916	1955.41	19.1521	2040.49	34.0978	2127.62	64.9145	2127.62	64.9145	91.906
TS12-KBR-1-28	682.032	3557.26	1.28223	16.9578	2.13601	0.440543	4.55905	0.0541823	4.0277	0.883452	340.147	13.345	370.635	14.1577	566	46.5166	340.147	13.345	NA
TS12-KBR-1-29	88.9225	65848.6	2.15007	12.7193	1.56381	2.09729	2.0652	0.193473	1.34891	0.65316	1140.16	14.0964	1147.92	14.2003	1162.58	30.9912	1162.58	30.9912	98.0715
TS12-KBR-1-30	131.382	101440	1.33577	13.9565	1.39883	1.61402	1.86136	0.163375	1.22797	0.65972	975.505	11.1166	975.671	11.6702	976.063	28.5135	976.063	28.5135	99.9428
TS12-KBR-1-31	185.5	91255.2	4.12601	9.29994	0.447987	4.61538	1.55744	0.311305	1.49162	0.957738	1747.13	22.8276	1752.05	12.9985	1757.92	8.19368	1757.92	8.19368	99.3861
TS12-KBR-1-32	266.697	391498	1.06254	11.5591	0.415562	2.58461	1.49017	0.216679	1.43106	0.960329	1264.3	16.4293	1296.29	10.9103	1349.63	8.0203	1349.63	8.0203	93.6778
TS12-KBR-1-33	109.436	106577	1.46717	13.5301	0.853755	1.74113	1.81665	0.170857	1.60353	0.882687	1016.83	15.0843	1023.88	11.7171	1038.97	17.2553	1038.97	17.2553	97.8687
TS12-KBR-1-34	198.75	18742.7	53.271	7.9185	0.96755	6.00333	1.96639	0.344774	1.71188	0.870571	1909.59	28.2931	1976.33	17.117	2046.89	17.0952	2046.89	17.0952	93.2925
TS12-KBR-1-35	133.539	512213	1.70146	6.151	0.135116	10.7231	2.01239	0.47837	2.00785	0.997743	2520.16	41.8829	2499.43	18.6926	2482.61	2.27868	2482.61	2.27868	101.513
TS12-KBR-1-36	73.6718	42443.8	1.10247	9.73447	1.62762	4.39653	6.6724	0.3104	6.47084	0.969792	1742.67	98.8168	1711.69	55.2505	1673.96	30.0835	1673.96	30.0835	104.105
TS12-KBR-1-37	59.5173	12401.4	2.07315	10.6855	1.06737	2.74049	3.95992	0.212384	3.81335	0.962988	1241.51	43.0639	1339.51	29.4671	1499.73	20.1813	1499.73	20.1813	82.7819
TS12-KBR-1-38	164.296	8928.1	0.794355	5.75673	0.264036	11.2445	1.67201	0.469478	1.65103	0.987453	2481.27	34.0039	2543.61	15.592	2593.7	4.40125	2593.7	4.40125	95.6652
TS12-KBR-1-39	324.957	3180.83	1.45117	17.2205	1.94778	0.445871	2.98702	0.055687	2.2646	0.758147	349.343	7.70066	374.384	9.35318	532.433	42.6688	349.343	7.70066	NA
TS12-KBR-1-40	50.254	143288	1.00828	9.76394	1.16467	4.1779	1.67771	0.295857	1.20758	0.71978	1670.73	17.773	1669.69	13.746	1668.38	21.5421	1668.38	21.5421	100.141
TS12-KBR-1-41	261.393	581722	2.96043	5.29869	0.356501	13.8613	1.06051	0.532687	0.998799	0.941806	2752.76	22.3777	2740.28	10.044	2731.08	5.86649	2731.08	5.86649	100.794
TS12-KBR-1-42	83.009	10687.7	0.923766	6.22124	0.731162	8.3091	1.36911	0.374912	1.15752	0.845457	2052.47	20.3471	2265.31	12.4089	2463.44	12.3518	2463.44	12.3518	83.3172
TS12-KBR-1-43	159.882	50125.5	1.73645	17.6243	2.94404	0.60979	3.2159	0.0779455	1.29407	0.402398	483.848	6.03213	483.428	12.3699	481.413	65.0506	483.848	6.03213	100.506
TS12-KBR-1-44	34.0615	20126.5	1.3573	13.1785	2.71205	1.90195	3.27418	0.181787	1.83441	0.560265	1076.73	18.1903	1081.77	21.7926	1091.92	54.3349	1091.92	54.3349	98.6085
TS12-KBR-1-45	144.398	170888	2.01914	13.4288	0.516369	1.79871	1.67717	0.175186	1.5957	0.951425	1040.62	15.3343	1044.99	10.9453	1054.16	10.42	1054.16	10.42	98.7158
TS12-KBR-1-46	119.311	66748.5	1.43542	14.1272	0.898332	1.5763	3.4035	0.161507	3.28281	0.964538	965.149	29.4264	960.912	21.1476	951.224	18.3867	951.224	18.3867	101.464
TS12-KBR-1-47	75.3169	102863	0.916519	13.406	2.73074	1.83057	3.43003	0.177985	2.07561	0.605129	1055.96	20.2166	1056.48	22.5274	1057.59	54.9859	1057.59	54.9859	99.8453
TS12-KBR-1-48	109.684	237258	1.75463	9.47906	0.589233	4.47465	1.19912	0.307626	1.04437	0.870942	1729.01	15.8384	1726.28	9.952	1722.95	10.8243	1722.95	10.8243	100.352
TS12-KBR-1-49	69.2614	76232.6	2.24446	12.8634	0.720508	2.10374	1.13892	0.196267	0.882047	0.774459	1155.23	9.32886	1150.03	7.8386	1140.25	14.3181	1140.25	14.3181	101.314
TS12-KBR-1-50	92.9573	149876	1.9621	9.79443	0.704633	4.26065	1.28664	0.302659	1.07654	0.836706	1704.48	16.124	1685.79	10.5813	1662.61	13.0418	1662.61	13.0418	102.519
TS12-KBR-1-51	9.94711	9164.58	1.4332	12.7288	9.77721	2.00687	10.5533	0.18527	3.97218	0.376393	1095.7	40.026	1117.83	71.6378	1161.1	194.284	1161.1	194.284	94.3678
TS12-KBR-1-52	285.32	1.02384e+06	1.09164	5.05793	0.157027	15.1022	0.867392	0.554002	0.85306	0.983477	2841.8	19.6047	2821.7	8.26057	2807.37	2.56756	2807.37	2.56756	101.226
TS12-KBR-1-53	171.239	187361	3.01026	9.92922	0.312258	4.06892	2.01819	0.293017	1.99388	0.987958	1656.59	29.1279	1648.1	16.451	1637.27	5.79895	1637.27	5.79895	101.18
TS12-KBR-1-54	37.4214	48059.8	0.859462	9.03421	1.16145	4.97169	1.51717	0.325757	0.976135	0.643392	1817.78	15.4617	1814.52	12.8261	1810.76	21.1036	1810.76	21.1036	100.388
TS12-KBR-1-55	65.1123	41337.3	1.59233	17.348	6.7744	0.559226	7.04615	0.0703618	1.93798	0.275042	438.335	8.21249	451.023	25.6657	516.213	148.939	438.335	8.21249	84.9136
TS12-KBR-1-56	161.9	250029	2.06798	9.04009	0.331822	4.98376	1.62092	0.32676	1.58659	0.978822	1822.66	25.1897	1816.57	13.7089	1809.58	6.0304	1809.58	6.0304	100.723
TS12-KBR-1-57	124.953	110973	0.800879	5.26075	0.154314	13.9589	3.01726	0.532597	3.01331	0.998691	2752.38	67.507	2746.92	28.5962	2742.9	2.53817	2742.9	2.53817	100.346
TS12-KBR-1-58	71.2562	72765.2	2.01226	10.6066	0.861316	3.39411	3.33296	0.261097	3.21975	0.966032	1495.45	42.9734	1503.04	26.1464	1513.73	16.2546	1513.73	16.2546	98.7926
TS12-KBR-1-59	82.0591	89391.8	1.26714	9.93093	0.773975	4.05514	2.2263	0.292075	2.08743	0.937624	1651.89	30.4187	1645.33	18.1356	1636.95	14.3743	1636.95	14.3743	100.913
TS12-KBR-1-60	94.8757	397652	3.21361	2.93016	0.357002	35.2178	4.76869	0.74843	4.75531	0.997194	3601.73	131.238	3644.77	47.1173	3668.5	5.45505	3668.5	5.45505	98.18
TS12-KBR-1-61	86.6848	53683.1	2.20276	13.0787	1.59952	2.01677	2.08462	0.191302	1.33687	0.641298	1128.42	13.839	1121.17	14.1514	1107.17	31.9594	1107.17	31.9594	101.92
TS12-KBR-1-62	70.8272	102638	1.43182	9.13925	0.340545	4.67237	2.69017	0.309704	2.66853	0.991955	1739.25	40.6789	1762.31	22.5037	1789.73	6.20412	1789.73	6.20412	97.1794
TS12-KBR-1-63	106.816	139721	2.34934	12.3036	1.65549	2.33823	2.53643	0.208649	1.92168	0.757631	1221.62	21.3854	1223.98	18.0414	1228.14	32.5224	1228.14	32.5224	99.4693
TS12-KBR-1-64	630.292	420979	1.63767	17.952	0.693826	0.54529	1.42922	0.070997	1.2495	0.874259	442.16	5.33959	441.907	5.12093	440.567	15.4526	442.16	5.33959	100.361
TS12-KBR-1-65	91.4835	37647	2.22205	18.0433	4.40523	0.505677	4.89526	0.0661739	2.13484	0.436104	413.064	8.54168	415.538	16.695	429.279	98.2518	413.064	8.54168	96.2227
TS12-KBR-1-66	220.395	4576.99	0.367378	9.34669	1.13567	4.2303	3.2956	0.286766	3.09374	0.938749	1625.35	44.4465	1679.92	27.0715	1748.74	20.7939	1748.74	20.7939	92.9439
TS12-KBR-1-67	26.5402	36931.6	1.06754	9.68151	5.32889	3.97058	6.37646	0.278801	3.50173	0.549165	1585.32	49.2154	1628.2	51.7645	1684.04	98.4358	1684.04	98.4358	94.138
TS12-KBR-1-68	245.897	93388.2	10.5692	10.0529	0.339257	3.92591	4.60792	0.286241	4.59541	0.997286	1622.72	65.9277	1619.04	37.3065	1614.24	6.31741	1614.24	6.31741	100.525
TS12-KBR-1-69	135.666	213333	1.30804	9.3943	0.400175	4.52629	2.28747	0.308394	2.2522	0.984579	1732.8	34.2212	1735.81	19.0259	1739.44	7.33427	1739.44	7.33427	99.6183
TS12-KBR-1-70	446.131	114751	1.65331	11.3083	0.470162	2.38732	9.51153	0.195797	9.4999	0.998778	1152.7	100.281	1238.81	68.169	1391.85	9.02042	1391.85	9.02042	82.8181
TS12-KBR-1-71	476.3	57452.1	2.46536	5.77357	0.960734	10.5884	1.85841	0.443377	1.59081	0.856006	2365.74	31.5016	2487.69	17.2433	2588.83	16.0309	2588.83	16.0309	91.3828
TS12-KBR-1-72	123.147	88284.7	2.4487	9.22941	0.389699	4.77316	1.18974	0.319506	1.12411	0.944834	1787.31	17.5467	1780.19	9.98827	1771.83	7.11525	1771.83	7.11525	100.874
TS12-KBR-1-74	282.071	542808	1.27699	9.32845	0.173358	4.60338	2.28129	0.311447	2.27469	0.997108	1747.82	34.824	1749.88	19.0321	1752.32	3.17292	1752.32	3.17292	99.7435
TS12-KBR-1-75	39.5082	75587.5	0.489427	8.99243	1.72511	4.89263	4.16054	0.319094	3.78604	0.909987	1785.3	59.0415	1800.99	35.0902	1819.18	31.3153	1819.18	31.3153	98.1378
TS12-KBR-1-76	100.628	79035.7	2.87188	13.552	1.15521	1.74767	2.46856	0.171776	2.18157	0.883745	1021.89	20.6161	1026.3	15.9442	1035.71	23.3524	1035.71	23.3524	98.6659
TS12-KBR-1-77	52.8635	31575.3	1.17179	19.1222	8.53956	0.548611	8.69344	0.0760854	1.62842	0.187316	472.714	7.42231	444.086	31.281	298.317	195.125	472.714	7.42231	158.461
TS12-KBR-1-78	847.577	12384.6	6.33192	5.74005	0.404566	8.69663	2.22385	0.362047	2.18674	0.983313	1991.87	37.4709	2306.73	20.2546	2598.53	6.74242	2598.53	6.74242	76.6537
TS12-KBR-1-79	283.734	32667.5	2.15001	18.0839	1.18644	0.519605	2.2665	0.0681497	1.93116	0.852046	424.999	7.94272	424.887	7.86931	424.262	26.4718	424.999	7.94272	100.174
TS12-KBR-1-80	288.808	618074	1.98779	10.7217	0.29325	3.32034	1.23279	0.258193	1.19741	0.971296	1480.59	15.8401	1485.84	9.62049	1493.33	5.54964	1493.33	5.54964	99.1468
TS12-KBR-1-81	113.261	56486.1	0.922685	9.04255	0.627573	5.04278	2.61569	0.330719	2.53929	0.970791	1841.87	40.6827	1826.54	22.1676	1809.09	11.4042	1809.09	11.4042	101.812
TS12-KBR-1-82	231.608	182006	1.47407	18.1312	1.31434	0.52906	2.04097	0.0695713	1.56143	0.765042	433.572	6.54726	431.186	7.17057	418.434	29.3554	433.572	6.54726	103.618
TS12-KBR-1-83	76.2491	128891	1.58772	9.87432	0.825712	4.01912	1.77493	0.287831	1.57117	0.885201	1630.68	22.6371	1638.07	14.4326	1647.56	15.3143	1647.56	15.3143	98.9757
TS12-KBR-1-84	145.776	153265	3.44292	12.5973	0.778785	2.2044	2.25712	0.201404	2.11851	0.93859	1182.86	22.8945	1182.44	15.7675	1181.69	15.4124	1181.69	15.4124	100.099
TS12-KBR-1-85	111.05	77449.4	1.83774	11.386	0.553539	2.93487	2.54026	0.242359	2.47921	0.97597	1398.95	31.178	1390.95	19.2406	1378.68	10.6392	1378.68	10.6392	101.47
TS12-KBR-1-86	128.036	129870	1.46787	11.7343	0.9618	2.52631	2.30241	0.215002	2.09189	0.908568	1255.41	23.863	1279.64	16.7501	1320.53	18.6375	1320.53	18.6375	95.0686
TS12-KBR-1-87	70.2665	133607	1.5616	13.4368	0.971137	1.75172	2.65997	0.170709	2.47635	0.930971	1016.02	23.2777	1027.8	17.1952	1052.97	19.5834	1052.97	19.5834	96.4907
TS12-KBR-1-88	184.689	177466	2.33504	14.0657	0.815447	1.5918	1.8792	0.162386	1.69306	0.900945	970.023	15.2472	967.003	11.7195	960.162	16.6555	960.162	16.6555	101.027
TS12-KBR-1-89	227.8	436288	1.88626	5.01165	0.0954135	15.4439	1.49543	0.561355	1.49238	0.997962	2872.23	34.589	2843.03	14.2619	2822.39	1.55797	2822.39	1.55797	101.766
TS12-KBR-1-90	272.628	87909.4	2.31146	10.6921	0.22836	3.50876	0.925195	0.272091	0.89657	0.969061	1551.41	12.3623	1529.19	7.31084	1498.57	4.31859	1498.57	4.31859	103.526
TS12-KBR-1-91	249.853	333419	36.7964	6.0487	0.181321	10.8602	1.40688	0.47643	1.39514	0.99166	2511.7	29.0219	2511.23	13.0815	2510.84	3.04641	2510.84	3.04641	100.034
TS12-KBR-1-92	95.2202	74288.6	1.81187	10.8257	0.999662	3.21111	2.32044	0.252123	2.09407	0.902444	1449.41	27.1817	1459.84	17.9682	1475.04	18.965	1475.04	18.965	98.2628
TS12-KBR-1-93	33.5387	42487.8	0.880827	6.09242	0.693875	8.62414	1.97376	0.381069	1.84777	0.936169	2081.28	32.8669	2299.11	17.9607	2498.73	11.6801	2498.73	11.6801	83.2933
TS12-KBR-1-94	27.0381	49465.1	0.546898	8.90202	2.23628	5.21211	2.6589	0.336512	1.43832	0.540948	1869.87	23.3456	1854.6	22.6557	1837.5	40.5047	1837.5	40.5047	101.762
TS12-KBR-1-95	319.282	373134	1.93459	9.329	0.205574	4.72195	0.770778	0.319489	0.742858	0.963777	1787.23	11.5951	1771.14	6.45866	1752.21	3.76262	1752.21	3.76262	101.999
TS12-KBR-1-97	246.528	342714	1.74024	12.1787	0.33538	2.4201	2.43953	0.213763	2.41637	0.990505	1248.84	27.4336	1248.59	17.5297	1248.15	6.56582	1248.15	6.56582	100.055
TS12-KBR-1-98	197.601	58876.9	2.28342	13.4614	0.773247	1.87227	4.68413	0.182792	4.61987	0.986281	1082.21	46.0261	1071.33	31.0126	1049.28	15.6061	1049.28	15.6061	103.138
TS12-KBR-1-99	446.61	4297.31	2.01201	17.4633	1.77794	0.498847	4.1631	0.0631817	3.76435	0.904218	394.946	14.4209	410.922	14.0697	501.67	39.1281	394.946	14.4209	NA
TS12-KBR-1-100	21.9809	29611.3	0.979983	12.8387	5.41578	1.91782	5.70782	0.178578	1.80238	0.315773	1059.2	17.6049	1087.31	38.1113	1144.04	107.715	1144.04	107.715	92.584
Notes:
1. Analyses with >10% uncertainty (1-σ) in 206Pb/238U age are not included.
2. Analyses with >10% uncertainty (1-σ) in 206Pb/207Pb age are not included, unless 206Pb/238U age is <500 Ma.
3. Best age is determined from 206Pb/238U age for analyses with 206Pb/238U age <1000 Ma and from 206Pb/207Pb age for analyses with 206Pb/238U age >1000 Ma.
4. Concordance is based on 206Pb/238U age / 206Pb/207Pb age. Value is not reported for 206Pb/238U ages <500 Ma because of large uncertainty in 206Pb/207Pb age.
5. Analyses with 206Pb/238U age >500 Ma and with >20% discordance (<80% concordance) are not included.
6. Analyses with 206Pb/238U age >500 Ma and with >5% reverse discordance (<105% concordance) are not included.
7. All uncertainties are reported at the 1-σ level, and include only measurement errors.
8. Systematic errors are as follows (at 2-σ level): 1.4% (206Pb/238U) and 0.8% (206Pb/207Pb)
9. Analyses conducted by LA-MC-ICPMS, as described by Gehrels et al. (2008).
10. U concentration and U/Th are calibrated relative to Sri Lanka zircon standard and are accurate to ~20%.
11. Common Pb correction is from measured 204Pb with common Pb composition interpreted from Stacey and Kramers (1975).
12. Common Pb composition assigned uncertainties of 1.5 for 206Pb/204Pb, 0.3 for 207Pb/204Pb, and 2.0 for 208Pb/204Pb.
13. U/Pb and 206Pb/207Pb fractionation is calibrated relative to fragmetns of a large Sri Lanka zircon of 563.5 ± 3.2 Ma (2-σ).
14. U decay constants and composition are as follows: 238U = 9.845x10^(-10); 235U = 1.55125x10^(-10); 238U/235U = 137.88
15. Weighted mean and concordia plots determined with Isoplot (Ludwig, 2008).

## Sheet: (RHY-1)  rhyolite
Appendix II. U/Pb detrital zircon geochronologic analyses by LA-ICP-MS analysis
	Isotope Ratios										Apparent Ages (Ma)
Analysis	U	206Pb	U/Th	206Pb*	± 1σ	207Pb*	± 1σ	206Pb*	± 1σ	error	206Pb*	± 1σ	207Pb*	± 1σ	206Pb*	± 1σ	Best Age	± 1σ	% conc
	(ppm)	204Pb		207Pb*	(%)	235U	(%)	238U	(%)	corr.	238U	(Ma)	235U	(Ma)	207Pb*	(Ma)	(Ma)	(Ma)
Sample TS12-RHY-1: rhyolite tuff from beneath Sage Creek stratigraphy
TS12-RHY-1-1	668.773	23159.1	1.41131	21.5207	8.01762	0.0471431	8.27753	0.00735823	2.05796	0.24862	47.2606	0.969047	46.7742	3.78394	21.9225	192.715	47.2606	0.969047	NA
TS12-RHY-1-2-C	116.763	17754.9	0.75964	22.4251	14.9671	0.0933335	15.4287	0.01518	3.74591	0.242788	97.121	3.61079	90.6039	13.3742	-77.8186	367.907	97.121	3.61079	NA
TS12-RHY-1-2-R	124.021	6769.77	0.994029	20.6197	18.1787	0.10047	18.5059	0.015025	3.46473	0.187223	96.1373	3.30618	97.2098	17.1569	123.578	431.196	96.1373	3.30618	NA
TS12-RHY-1-3	238.972	15599	0.873559	20.1706	17.317	0.0490669	18.2274	0.00717805	5.68873	0.312098	46.1074	2.61357	48.638	8.65667	175.19	406.585	46.1074	2.61357	NA
TS12-RHY-1-4	839.194	24936.6	1.32273	21.5491	4.46162	0.0477006	4.79334	0.00745508	1.75214	0.365536	47.8803	0.835821	47.3146	2.21592	18.767	107.208	47.8803	0.835821	NA
TS12-RHY-1-5	216.67	7931.47	1.1834	20.0676	16.0866	0.050067	16.7202	0.00728695	4.55909	0.272669	46.8044	2.12612	49.6055	8.09497	187.121	376.545	46.8044	2.12612	NA
TS12-RHY-1-6	324.563	15741.9	1.49898	22.5247	12.428	0.0461031	12.9498	0.00753161	3.63925	0.281027	48.37	1.75372	45.7653	5.79501	-88.6737	305.673	48.37	1.75372	NA
TS12-RHY-1-7	686.63	18509.7	1.4221	19.8042	5.86888	0.0508781	6.02192	0.0073078	1.34896	0.224008	46.9378	0.630871	50.3895	2.96036	217.795	135.972	46.9378	0.630871	NA
TS12-RHY-1-9	1148.92	42328.6	1.27828	21.3448	3.92545	0.0479426	4.10478	0.00742185	1.20002	0.292346	47.6676	0.56991	47.5492	1.90679	41.6029	93.886	47.6676	0.56991	NA
TS12-RHY-1-10	296.45	15316.4	1.24504	21.703	12.1805	0.04684	12.988	0.00737286	4.5083	0.347112	47.3542	2.12705	46.4803	5.90085	1.61866	294.424	47.3542	2.12705	NA
TS12-RHY-1-11	1319.71	27685.7	1.26212	21.0237	4.50363	0.0481124	4.85309	0.00733609	1.80827	0.372601	47.1188	0.848928	47.7137	2.26203	77.6857	107.001	47.1188	0.848928	NA
TS12-RHY-1-12	676.621	14799.2	1.50447	21.7525	11.1467	0.0466869	11.3096	0.0073655	1.91257	0.169111	47.307	0.901469	46.3318	5.12221	-3.83738	269.561	47.307	0.901469	NA
TS12-RHY-1-13	911.418	29278	1.29602	21.615	6.40679	0.0472936	7.03319	0.00741405	2.90151	0.412545	47.6178	1.37654	46.9202	3.22491	11.4354	154.207	47.6178	1.37654	NA
TS12-RHY-1-14	840.524	42788.9	1.39302	20.8632	3.22557	0.0490486	3.96331	0.00742175	2.30294	0.581065	47.667	1.0937	48.6203	1.88157	95.8946	76.3702	47.667	1.0937	NA
TS12-RHY-1-15	538.946	28079.7	1.43191	22.3909	11.9637	0.0461527	12.3877	0.00749492	3.2133	0.259394	48.1352	1.54097	45.8134	5.54915	-74.0857	293.349	48.1352	1.54097	NA
TS12-RHY-1-16-C	163.42	8326.13	0.750249	21.7317	13.4404	0.095922	14.1144	0.0151186	4.30933	0.305315	96.7312	4.13735	93.005	12.5445	-1.5367	325.294	96.7312	4.13735	NA
TS12-RHY-1-16-R	163.864	6345.44	0.832967	20.2877	14.6879	0.101406	14.9555	0.014921	2.81604	0.188295	95.4763	2.66884	98.0738	13.9822	161.716	345.074	95.4763	2.66884	NA
TS12-RHY-1-17	983.863	26496.8	1.26068	21.631	5.5944	0.0471705	6.00229	0.00740026	2.17489	0.362344	47.5295	1.02991	46.8008	2.74537	9.64699	134.692	47.5295	1.02991	NA
TS12-RHY-1-18	683.119	16691.1	1.45241	22.3066	12.9351	0.0457482	13.0552	0.00740127	1.76646	0.135308	47.536	0.836617	45.4207	5.79914	-64.8742	316.781	47.536	0.836617	NA
TS12-RHY-1-19	447.496	19973.3	1.71509	22.2409	14.2544	0.0461289	14.7478	0.00744087	3.78281	0.256499	47.7893	1.80109	45.7903	6.60317	-57.6747	348.862	47.7893	1.80109	NA
TS12-RHY-1-20	689.599	35021.9	1.4163	21.0926	4.72537	0.0485569	5.39391	0.00742813	2.60098	0.482207	47.7079	1.23629	48.1443	2.53626	69.9483	112.439	47.7079	1.23629	NA
TS12-RHY-1-21	537.524	28483.7	1.42907	22.4011	5.98059	0.0452363	6.5747	0.00734944	2.73116	0.415404	47.2043	1.28451	44.9236	2.88921	-75.1949	146.333	47.2043	1.28451	NA
TS12-RHY-1-22	118.232	3919.16	0.658229	16.6344	27.5152	0.0596226	28.4727	0.00719311	7.32169	0.257148	46.2038	3.37081	58.8037	16.2688	607.746	605.595	46.2038	3.37081	NA
TS12-RHY-1-23	721.831	19514.2	1.19742	20.3198	5.78351	0.0494357	7.18569	0.00728551	4.26441	0.593459	46.7951	1.98831	48.9949	3.43704	158.002	135.439	46.7951	1.98831	NA
TS12-RHY-1-24	841.664	21414.8	1.40785	20.9896	6.88641	0.0483974	7.04706	0.00736758	1.49616	0.21231	47.3203	0.705395	47.9897	3.3032	81.5369	163.607	47.3203	0.705395	NA
TS12-RHY-1-25	346.1	14686	1.47809	22.9762	9.85824	0.0440501	10.3288	0.00734046	3.08202	0.298392	47.1468	1.44777	43.7706	4.42494	-137.559	244.476	47.1468	1.44777	NA
Notes:
1. Analyses with >10% uncertainty (1-σ) in 206Pb/238U age are not included.
2. Analyses with >10% uncertainty (1-σ) in 206Pb/207Pb age are not included, unless 206Pb/238U age is <500 Ma.
3. Best age is determined from 206Pb/238U age for analyses with 206Pb/238U age <1000 Ma and from 206Pb/207Pb age for analyses with 206Pb/238U age >1000 Ma.
4. Concordance is based on 206Pb/238U age / 206Pb/207Pb age. Value is not reported for 206Pb/238U ages <500 Ma because of large uncertainty in 206Pb/207Pb age.
5. Analyses with 206Pb/238U age >500 Ma and with >20% discordance (<80% concordance) are not included.
6. Analyses with 206Pb/238U age >500 Ma and with >5% reverse discordance (<105% concordance) are not included.
7. All uncertainties are reported at the 1-σ level, and include only measurement errors.
8. Systematic errors are as follows (at 2-σ level): 1.4% (206Pb/238U) and 0.8% (206Pb/207Pb)
9. Analyses conducted by LA-MC-ICPMS, as described by Gehrels et al. (2008).
10. U concentration and U/Th are calibrated relative to Sri Lanka zircon standard and are accurate to ~20%.
11. Common Pb correction is from measured 204Pb with common Pb composition interpreted from Stacey and Kramers (1975).
12. Common Pb composition assigned uncertainties of 1.5 for 206Pb/204Pb, 0.3 for 207Pb/204Pb, and 2.0 for 208Pb/204Pb.
13. U/Pb and 206Pb/207Pb fractionation is calibrated relative to fragmetns of a large Sri Lanka zircon of 563.5 ± 3.2 Ma (2-σ).
14. U decay constants and composition are as follows: 238U = 9.845x10^(-10); 235U = 1.55125x10^(-10); 238U/235U = 137.88
15. Weighted mean and concordia plots determined with Isoplot (Ludwig, 2008).
16. -C denotes "core"; -R denotes "rim"

## Sheet: (SCS7-Z1) Lower Sage Creek
Appendix II. U/Pb detrital zircon geochronologic analyses by LA-ICP-MS analysis
	Isotope Ratios										Apparent Ages (Ma)
Analysis	U	206Pb	U/Th	206Pb*	± 1σ	207Pb*	± 1σ	206Pb*	± 1σ	error	206Pb*	± 1σ	207Pb*	± 1σ	206Pb*	± 1σ	Best Age	± 1σ	% conc
	(ppm)	204Pb		207Pb*	(%)	235U	(%)	238U	(%)	corr.	238U	(Ma)	235U	(Ma)	207Pb*	(Ma)	(Ma)	(Ma)
Sample TS12-SCS7-Z1: Lower Sage Creek Formation; pedogenically altered fluvial sandstone
TS12-SCS7-Z1-2	626.409	18120.8	1.65593	21.3138	6.38831	0.0535846	7.45973	0.00828323	3.85189	0.516358	53.1772	2.0399	53.0012	3.85235	45.0305	152.809	53.1772	2.0399	NA
TS12-SCS7-Z1-3	556.404	253756	1.77694	6.49705	1.33745	9.04621	3.30464	0.426266	3.0219	0.914441	2288.86	58.2225	2342.69	30.2236	2389.88	22.7673	2389.88	22.7673	95.7732
TS12-SCS7-Z1-5	86.6656	5238.06	0.516395	17.1665	32.6392	0.0600763	35.4302	0.00747971	13.7834	0.38903	48.0379	6.59664	59.2384	20.3905	539.264	732.07	48.0379	6.59664	NA
TS12-SCS7-Z1-7	394.318	578710	2.56201	9.52816	0.215677	4.32211	4.92248	0.298678	4.91776	0.99904	1684.75	72.9131	1697.59	40.6123	1713.46	3.96672	1713.46	3.96672	98.3246
TS12-SCS7-Z1-8	73.0915	2238.69	0.837513	34.8787	107.686	0.031396	108.159	0.00794207	10.1127	0.0934978	50.9956	5.13667	31.3887	33.4426	-1300.37	0	50.9956	5.13667	NA
TS12-SCS7-Z1-9	63.3022	2158.94	0.708715	11.6818	170.748	0.0884608	171.099	0.0074948	10.9551	0.0640277	48.1344	5.25353	86.0685	142.115	1329.22	500.214	48.1344	5.25353	NA
TS12-SCS7-Z1-10	841.797	25323.1	1.38565	21.7279	2.97089	0.046295	3.6606	0.00729542	2.13864	0.584232	46.8586	0.998503	45.9516	1.64461	-1.11127	71.6304	46.8586	0.998503	NA
TS12-SCS7-Z1-11	280.313	275528	2.88193	7.01308	0.228499	7.49809	1.82183	0.381381	1.80744	0.992103	2082.73	32.1686	2172.76	16.3232	2258.89	3.94389	2258.89	3.94389	92.2013
TS12-SCS7-Z1-12	60.8588	3148.89	0.504574	9.92583	165.869	0.109046	166.109	0.00785008	8.92797	0.0537478	50.4073	4.4828	105.092	167.336	1637.9	246.327	50.4073	4.4828	NA
TS12-SCS7-Z1-13	99.8546	3943.67	0.739026	14.533	36.6244	0.0768452	37.2987	0.00809971	7.06006	0.189284	52.0038	3.65673	75.1745	27.0327	893.006	781.907	52.0038	3.65673	NA
TS12-SCS7-Z1-14	2833.19	37367.5	3.0317	20.8416	1.04453	0.0871114	2.37859	0.0131675	2.13697	0.898419	84.3293	1.79036	84.809	1.93531	98.3491	24.7139	84.3293	1.79036	NA
TS12-SCS7-Z1-15	90.031	4892.49	0.787064	16.869	45.1392	0.0643579	46.5326	0.0078739	11.3022	0.242887	50.5596	5.69199	63.3312	28.577	577.413	1032.1	50.5596	5.69199	NA
TS12-SCS7-Z1-16	289.222	15685.3	1.89579	20.1183	18.6782	0.0588326	19.1405	0.00858437	4.18135	0.218456	55.1022	2.2942	58.0464	10.7992	181.244	438.558	55.1022	2.2942	NA
TS12-SCS7-Z1-18	176.446	8317.07	2.80601	24.155	25.8257	0.0444097	26.2969	0.00778006	4.95579	0.188456	49.9594	2.46631	44.1202	11.3543	-262.924	664.39	49.9594	2.46631	NA
TS12-SCS7-Z1-19	820.018	4905.25	6.2915	20.5953	5.07941	0.0525429	5.36024	0.00784841	1.71224	0.319434	50.3966	0.859549	51.9968	2.717	126.408	119.646	50.3966	0.859549	NA
TS12-SCS7-Z1-20	102.783	5004.67	0.541344	26.3504	33.6601	0.0389039	34.4878	0.00743495	7.51053	0.217773	47.7515	3.57314	38.7533	13.1141	-488.692	915.43	47.7515	3.57314	NA
TS12-SCS7-Z1-21	1253.58	645449	7.58613	7.89185	6.01035	5.20767	9.16656	0.298072	6.9211	0.755038	1681.74	102.459	1853.87	78.2365	2052.85	106.221	2052.85	106.221	81.9224
TS12-SCS7-Z1-22	382.625	379331	2.50389	10.0366	1.2388	3.66275	2.27686	0.266619	1.91036	0.839032	1523.62	25.9227	1563.29	18.1626	1617.27	23.0643	1617.27	23.0643	94.209
TS12-SCS7-Z1-23	80.8338	52830.5	1.06248	5.23293	0.320469	14.0435	2.76972	0.532989	2.75112	0.993284	2754.03	61.6624	2752.65	26.2597	2751.62	5.26679	2751.62	5.26679	100.088
TS12-SCS7-Z1-24	729.899	67871.1	8.78862	5.96362	0.459007	10.2989	1.86258	0.445449	1.80514	0.969159	2374.99	35.8615	2462	17.2402	2534.64	7.70102	2534.64	7.70102	93.7011
TS12-SCS7-Z1-25	35.4315	1532.14	0.76357	14.1034	128.792	0.075608	129.192	0.00773374	10.1676	0.0787015	49.6631	5.03016	74.0073	92.4653	954.658	530.065	49.6631	5.03016	NA
TS12-SCS7-Z1-26	227.732	11062.4	1.5225	21.3128	32.8023	0.0525604	33.5744	0.00812453	7.15904	0.213229	52.1625	3.71927	52.0137	17.0251	45.14	802.861	52.1625	3.71927	NA
TS12-SCS7-Z1-29	199.554	490814	3.53324	6.26098	0.529028	9.74531	2.26672	0.442524	2.20412	0.972383	2361.93	43.5886	2411	20.8769	2452.68	8.94869	2452.68	8.94869	96.3
TS12-SCS7-Z1-31	62.6624	2522.59	1.18634	25.8141	58.4696	0.0416273	60.1212	0.00779352	13.9954	0.232786	50.0455	6.97693	41.4116	24.401	-434.384	1666.22	50.0455	6.97693	NA
TS12-SCS7-Z1-32	866.593	17808.2	1.361	21.5612	6.08583	0.0462938	6.15054	0.00723925	0.889821	0.144674	46.4991	0.41227	45.9504	2.76321	17.3814	146.302	46.4991	0.41227	NA
TS12-SCS7-Z1-33	308.496	19400.8	1.899	22.1372	10.9375	0.048116	11.0368	0.00772523	1.47681	0.133808	49.6086	0.729813	47.7172	5.14466	-46.3024	266.649	49.6086	0.729813	NA
TS12-SCS7-Z1-34	154.233	58006.4	1.39801	17.5626	2.80667	0.570926	6.01342	0.0727224	5.31826	0.884397	452.536	23.2418	458.613	22.1945	489.17	61.9349	452.536	23.2418	92.5111
TS12-SCS7-Z1-35	129.961	6975.39	96.7486	21.33	32.5107	0.053433	32.7632	0.00826606	4.05981	0.123914	53.0674	2.1456	52.8551	16.8756	43.2168	795.637	53.0674	2.1456	NA
TS12-SCS7-Z1-36	2518.48	771636	22.2903	6.57688	0.189109	8.08997	7.20644	0.385892	7.20396	0.999656	2103.75	129.326	2241.13	65.2127	2369.07	3.22632	2369.07	3.22632	88.8006
TS12-SCS7-Z1-37	450.046	617.771	0.911681	15.1941	36.2237	0.0646869	37.1157	0.00712837	8.08836	0.217923	45.7894	3.69049	63.645	22.9011	800.478	783.865	45.7894	3.69049	NA
TS12-SCS7-Z1-38	2832.44	52139.8	1.58432	20.9059	1.58924	0.0854417	2.20956	0.012955	1.53508	0.694743	82.9769	1.2656	83.2482	1.76604	91.0453	37.6586	82.9769	1.2656	NA
TS12-SCS7-Z1-39	556.33	13272.2	7.52114	20.4486	6.47082	0.0516446	6.61898	0.00765926	1.39263	0.210399	49.1867	0.68238	51.1298	3.30049	143.187	151.959	49.1867	0.68238	NA
TS12-SCS7-Z1-41	614.326	326914	22.5174	6.80874	1.20009	7.35149	2.51832	0.363029	2.21399	0.879152	1996.51	38.0132	2155.09	22.5125	2309.78	20.6001	2309.78	20.6001	86.4372
TS12-SCS7-Z1-42	243.819	5875.73	5.04003	21.5383	9.60958	0.0499811	10.4376	0.00780757	4.07427	0.390345	50.1353	2.03473	49.5224	5.04497	19.9723	231.195	50.1353	2.03473	NA
TS12-SCS7-Z1-44	77.2788	2406.65	0.62023	18.9353	23.6845	0.0547648	24.7173	0.00752093	7.07035	0.286048	48.3016	3.40233	54.138	13.0317	320.73	544.934	48.3016	3.40233	NA
TS12-SCS7-Z1-46	106.643	7835.51	0.586186	30.5913	75.0942	0.0349092	75.526	0.00774527	8.06479	0.106782	49.7369	3.99574	34.8416	25.8737	-902.652	2532.39	49.7369	3.99574	NA
TS12-SCS7-Z1-47	553.844	7608.25	11.7118	20.1055	7.97355	0.0534741	8.4821	0.00779752	2.89284	0.341052	50.0711	1.44286	52.8947	4.37175	182.733	185.989	50.0711	1.44286	NA
TS12-SCS7-Z1-48	78.017	3295.09	0.873696	13.2732	97.2559	0.0775523	97.5603	0.00746568	7.70034	0.078929	47.9481	3.67847	75.841	71.4125	1077.58	#VALUE!	47.9481	3.67847	NA
TS12-SCS7-Z1-49	807.276	17210.6	7.31986	21.0307	4.43627	0.0517304	4.63056	0.00789038	1.32723	0.286625	50.665	0.669806	51.2127	2.31263	76.896	105.414	50.665	0.669806	NA
TS12-SCS7-Z1-50	96.7116	125447	2.57976	5.61774	0.5502	11.9723	2.71806	0.487794	2.66179	0.979298	2561.13	56.2597	2602.24	25.4766	2634.38	9.13887	2634.38	9.13887	97.2192
TS12-SCS7-Z1-51	96.0347	268758	2.12592	6.17737	0.622306	10.6154	1.67635	0.475596	1.55656	0.928542	2508.06	32.3413	2490.06	15.5571	2475.39	10.4999	2475.39	10.4999	101.32
TS12-SCS7-Z1-53	286.902	205511	0.811141	10.823	0.250984	3.29201	2.1179	0.258409	2.10298	0.992953	1481.7	27.8383	1479.16	16.4959	1475.51	4.76111	1475.51	4.76111	100.419
TS12-SCS7-Z1-54	365.318	18045.5	1.57494	22.9492	10.0247	0.0479577	10.4668	0.00798222	3.01008	0.287583	51.2524	1.53662	47.5638	4.86365	-134.647	248.494	51.2524	1.53662	NA
TS12-SCS7-Z1-55	134.566	120823	1.76672	10.7624	0.719939	3.24934	1.68487	0.253632	1.52331	0.904112	1457.18	19.8675	1469.02	13.0826	1486.15	13.6378	1486.15	13.6378	98.0504
TS12-SCS7-Z1-57	92.0614	159717	1.91877	5.75432	1.6084	10.1872	4.07825	0.425156	3.74769	0.918945	2283.84	72.0752	2451.92	37.7257	2594.4	26.8269	2594.4	26.8269	88.0298
TS12-SCS7-Z1-58	661.281	12018.5	9.79023	22.053	4.99591	0.0480981	5.37401	0.00769295	1.98012	0.368463	49.4022	0.974486	47.6998	2.50412	-37.0382	121.34	49.4022	0.974486	NA
TS12-SCS7-Z1-59	562.146	29086.1	7.16559	20.8224	8.93725	0.0505663	8.99529	0.00763645	1.02015	0.113409	49.0407	0.498388	50.0882	4.39628	100.505	211.728	49.0407	0.498388	NA
TS12-SCS7-Z1-61	1244.44	437164	1.3347	6.29152	0.122404	9.61601	1.89311	0.438782	1.88915	0.997908	2345.19	37.1401	2398.7	17.4133	2444.45	2.07224	2444.45	2.07224	95.9394
TS12-SCS7-Z1-62	218.735	321527	0.696441	6.24763	0.549421	8.32153	2.22499	0.377066	2.15609	0.969033	2062.56	38.0586	2266.67	20.1712	2456.29	9.29023	2456.29	9.29023	83.9708
TS12-SCS7-Z1-63	128.12	232436	3.03399	9.54696	0.533461	4.45456	1.00991	0.308438	0.857523	0.849105	1733.02	13.0311	1722.55	8.3747	1709.83	9.81419	1709.83	9.81419	101.356
TS12-SCS7-Z1-64	609.407	16413.9	5.63022	10.1224	2.54617	0.592598	12.7591	0.0435053	12.5025	0.979886	274.524	33.6021	472.525	48.2426	1601.4	47.5089	274.524	33.6021	NA
TS12-SCS7-Z1-65	521.581	34144.7	2.23125	21.4175	11.423	0.0528526	11.6673	0.00820984	2.37488	0.20355	52.7079	1.24665	52.2955	5.94709	33.4609	274.34	52.7079	1.24665	NA
TS12-SCS7-Z1-66	220.638	7598.38	2.35568	20.0888	18.6532	0.0550412	19.526	0.00801938	5.77254	0.295633	51.4901	2.96045	54.4041	10.3437	184.663	437.69	51.4901	2.96045	NA
TS12-SCS7-Z1-67	1008.08	28618.3	6.11772	21.9981	4.42142	0.0484563	4.77835	0.00773099	1.81209	0.379229	49.6455	0.896166	48.0468	2.24238	-30.9975	107.228	49.6455	0.896166	NA
TS12-SCS7-Z1-68	490.027	968676	2.5023	6.75766	0.318083	7.05473	1.32076	0.345761	1.28189	0.970567	1914.32	21.2314	2118.35	11.7464	2322.7	5.45311	2322.7	5.45311	82.418
TS12-SCS7-Z1-69	35.2878	1329.86	1.32033	5.50412	396.682	0.194589	397.204	0.00776792	20.3674	0.051277	49.8818	10.1204	180.537	781.992	2668.27	293.714	49.8818	10.1204	NA
TS12-SCS7-Z1-70	1017.92	46037.5	3.83528	20.6843	6.36119	0.0505379	6.4681	0.00758154	1.17116	0.181067	48.6894	0.568082	50.0607	3.15946	116.221	150.127	48.6894	0.568082	NA
TS12-SCS7-Z1-72	1041.51	35332.6	9.08517	21.3524	5.74004	0.0501758	6.24935	0.00777031	2.47109	0.395416	49.897	1.22824	49.7107	3.03178	40.7547	137.37	49.897	1.22824	NA
TS12-SCS7-Z1-73	811.58	118869	3.80974	6.05151	0.144133	9.1894	1.73408	0.40332	1.72808	0.99654	2184.31	32.0169	2357.06	15.8809	2510.06	2.42119	2510.06	2.42119	87.022
TS12-SCS7-Z1-74	113.573	214390	1.86009	6.46929	1.08649	9.04188	1.76512	0.424242	1.39112	0.788113	2279.71	26.7125	2342.25	16.1393	2397.17	18.4806	2397.17	18.4806	95.1002
TS12-SCS7-Z1-75	228.198	449118	4.64578	6.1562	0.896807	8.90367	2.23055	0.39754	2.04233	0.915615	2157.7	37.4512	2328.18	20.3645	2481.18	15.124	2481.18	15.124	86.9628
TS12-SCS7-Z1-76	92.9221	183217	2.38229	9.41502	0.47952	4.55084	1.18997	0.310751	1.08907	0.915213	1744.4	16.6444	1740.32	9.90629	1735.4	8.79328	1735.4	8.79328	100.519
TS12-SCS7-Z1-77	49.255	2676.98	0.683769	13.1652	88.7129	0.0832989	89.2041	0.00795366	9.34835	0.104797	51.0697	4.75532	81.2418	69.7571	1093.97	167.425	51.0697	4.75532	NA
TS12-SCS7-Z1-78	993.944	527359	3.92664	9.4395	0.113354	3.56998	1.19152	0.244407	1.18612	0.995465	1409.57	15.0175	1542.88	9.4514	1730.63	2.08029	1730.63	2.08029	81.448
TS12-SCS7-Z1-80	61.2184	4281.68	0.570569	-3.11354	732.026	-0.349389	732.081	0.00788975	8.96864	0.0122509	50.661	4.5258	-436.456	#NUM!	NA	NA	50.661	4.5258	NA
TS12-SCS7-Z1-83	101.273	4935.75	0.620584	20.8381	26.2102	0.0527899	27.2216	0.00797824	7.35115	0.270049	51.2269	3.75085	52.2351	13.8605	98.7366	629.517	51.2269	3.75085	NA
TS12-SCS7-Z1-84	48.3189	1572.14	0.959342	39.493	84.1374	0.0279785	84.9873	0.00801387	11.9888	0.141066	51.4548	6.14428	28.0187	23.491	-1713.99	1225.85	51.4548	6.14428	NA
TS12-SCS7-Z1-85	117.814	148010	1.86179	6.22653	0.263159	9.9616	1.48495	0.449856	1.46145	0.984172	2394.61	29.2316	2431.23	13.7032	2462.01	4.44717	2462.01	4.44717	97.2627
TS12-SCS7-Z1-86	111.79	223750	2.11194	6.36645	0.932549	9.37959	2.97512	0.433092	2.82519	0.949605	2319.64	55.0404	2375.83	27.305	2424.39	15.8174	2424.39	15.8174	95.6795
TS12-SCS7-Z1-87	504.293	835063	11.8578	9.6943	0.380387	4.30058	1.20315	0.302372	1.14144	0.948706	1703.06	17.0836	1693.47	9.91215	1681.6	7.02428	1681.6	7.02428	101.276
TS12-SCS7-Z1-88	399.473	208544	6.87789	9.4017	0.209066	4.32459	1.56178	0.294883	1.54773	0.991	1665.88	22.7213	1698.06	12.8805	1737.99	3.83328	1737.99	3.83328	95.8511
TS12-SCS7-Z1-89	75.438	2287.71	0.691505	13.918	113.552	0.0775472	113.723	0.00782782	6.23965	0.0548671	50.2649	3.12416	75.8363	83.2877	981.703	409.887	50.2649	3.12416	NA
TS12-SCS7-Z1-90	252.454	286973	2.04865	5.62111	0.81118	12.1295	1.76358	0.494496	1.56595	0.887939	2590.1	33.4017	2614.47	16.5447	2633.39	13.4768	2633.39	13.4768	98.3561
TS12-SCS7-Z1-91	77.9104	172953	1.8215	6.24553	0.376413	10.4035	1.61152	0.471247	1.56694	0.972338	2489.03	32.3547	2471.36	14.9292	2456.86	6.36442	2456.86	6.36442	101.309
TS12-SCS7-Z1-92	101.55	249374	1.63555	5.32579	0.203011	13.4319	2.04129	0.518824	2.03116	0.995042	2694.19	44.7284	2710.5	19.293	2722.68	3.34526	2722.68	3.34526	98.9538
TS12-SCS7-Z1-93	433.319	18452.4	1.74796	21.6753	18.032	0.0499257	18.122	0.00784851	1.80411	0.0995538	50.3972	0.905679	49.4688	8.75008	4.71408	437.27	50.3972	0.905679	NA
TS12-SCS7-Z1-94	69.3082	40437.2	1.24488	16.185	5.00915	0.957551	5.16656	0.112402	1.2656	0.24496	686.683	8.24381	682.027	25.6669	666.673	107.296	686.683	8.24381	103.001
TS12-SCS7-Z1-95	79.377	83607.6	1.49576	9.50885	0.591099	4.42844	1.04495	0.305406	0.861698	0.82463	1718.06	12.9959	1717.67	8.65589	1717.19	10.8664	1717.19	10.8664	100.051
TS12-SCS7-Z1-96	78.8313	84.5357	0.61693	7.66099	27.4008	0.143164	28.6841	0.00795457	8.48361	0.29576	51.0756	4.31593	135.858	36.4907	2105.11	490.948	51.0756	4.31593	NA
TS12-SCS7-Z1-97	47.377	154731	1.52213	5.63826	0.519	11.3413	2.54994	0.463773	2.49657	0.979068	2456.2	50.992	2551.61	23.7981	2628.32	8.62868	2628.32	8.62868	93.451
TS12-SCS7-Z1-99	97.0997	4168.97	1.02505	28.8726	53.7954	0.0379281	54.9559	0.00794228	11.2341	0.20442	50.997	5.70645	37.7992	20.3937	-737.879	1606.62	50.997	5.70645	NA
TS12-SCS7-Z1-100	114.417	4569.66	0.491162	24.3685	45.7266	0.0439083	46.0641	0.00776023	5.56619	0.120836	49.8325	2.76308	43.6327	19.6757	-285.306	1221.3	49.8325	2.76308	NA
Notes:
1. Analyses with >10% uncertainty (1-σ) in 206Pb/238U age are not included.
2. Analyses with >10% uncertainty (1-σ) in 206Pb/207Pb age are not included, unless 206Pb/238U age is <500 Ma.
3. Best age is determined from 206Pb/238U age for analyses with 206Pb/238U age <1000 Ma and from 206Pb/207Pb age for analyses with 206Pb/238U age >1000 Ma.
4. Concordance is based on 206Pb/238U age / 206Pb/207Pb age. Value is not reported for 206Pb/238U ages <500 Ma because of large uncertainty in 206Pb/207Pb age.
5. Analyses with 206Pb/238U age >500 Ma and with >20% discordance (<80% concordance) are not included.
6. Analyses with 206Pb/238U age >500 Ma and with >5% reverse discordance (<105% concordance) are not included.
7. All uncertainties are reported at the 1-σ level, and include only measurement errors.
8. Systematic errors are as follows (at 2-σ level): 1.4% (206Pb/238U) and 0.8% (206Pb/207Pb)
9. Analyses conducted by LA-MC-ICPMS, as described by Gehrels et al. (2008).
10. U concentration and U/Th are calibrated relative to Sri Lanka zircon standard and are accurate to ~20%.
11. Common Pb correction is from measured 204Pb with common Pb composition interpreted from Stacey and Kramers (1975).
12. Common Pb composition assigned uncertainties of 1.5 for 206Pb/204Pb, 0.3 for 207Pb/204Pb, and 2.0 for 208Pb/204Pb.
13. U/Pb and 206Pb/207Pb fractionation is calibrated relative to fragmetns of a large Sri Lanka zircon of 563.5 ± 3.2 Ma (2-σ).
14. U decay constants and composition are as follows: 238U = 9.845x10^(-10); 235U = 1.55125x10^(-10); 238U/235U = 137.88
15. Weighted mean and concordia plots determined with Isoplot (Ludwig, 2008).

## Sheet: (SCS2-Z1) Upper Sage Creek
Appendix II. U/Pb detrital zircon geochronologic analyses by LA-ICP-MS analysis
	Isotope Ratios										Apparent Ages (Ma)
Analysis	U	206Pb	U/Th	206Pb*	± 1σ	207Pb*	± 1σ	206Pb*	± 1σ	error	206Pb*	± 1σ	207Pb*	± 1σ	206Pb*	± 1σ	Best Age	± 1σ	% conc
	(ppm)	204Pb		207Pb*	(%)	235U	(%)	238U	(%)	corr.	238U	(Ma)	235U	(Ma)	207Pb*	(Ma)	(Ma)	(Ma)
Sample TS12-SCS2-Z1: Upper Sage Creek Formation; fluvial sandstone
TS12-SCS2-Z1-1	76.5304	124107	2.39713	6.89009	1.35904	7.19704	4.90023	0.359648	4.708	0.960771	1980.51	80.2839	2136.14	43.7131	2289.38	23.3798	2289.38	23.3798	86.5085
TS12-SCS2-Z1-3	210.656	149508	2.91786	13.1836	0.783133	1.83549	1.64984	0.175502	1.45213	0.880163	1042.36	13.976	1058.25	10.8446	1091.15	15.6757	1091.15	15.6757	95.5283
TS12-SCS2-Z1-4	207.482	7646.52	1.40539	20.9518	16.6002	0.05099	17.4845	0.00774826	5.49017	0.314001	49.756	2.72117	50.4976	8.61352	85.8639	396.046	49.756	2.72117	NA
TS12-SCS2-Z1-5	314.49	7618.82	1.00451	22.212	18.6374	0.0458057	18.8291	0.00737916	2.67954	0.142309	47.3945	1.2653	45.4766	8.37408	-54.5153	457.267	47.3945	1.2653	NA
TS12-SCS2-Z1-6	78.1121	123443	0.957357	9.8591	0.682332	4.10594	1.77511	0.293595	1.63873	0.923171	1659.47	23.976	1655.48	14.4951	1650.42	12.6486	1650.42	12.6486	100.548
TS12-SCS2-Z1-7	144.096	184435	2.5885	9.12351	0.335561	4.79865	1.33161	0.317526	1.28864	0.967728	1777.64	20.0203	1784.66	11.1897	1792.87	6.11094	1792.87	6.11094	99.1503
TS12-SCS2-Z1-8	276.62	346203	0.812713	8.45722	0.201978	5.60137	1.9867	0.343574	1.97641	0.994819	1903.84	32.5805	1916.31	17.1184	1929.81	3.61598	1929.81	3.61598	98.6543
TS12-SCS2-Z1-9	150.339	3539.56	1.44017	20.612	28.8708	0.0497574	30.2014	0.00743835	8.86565	0.293551	47.7733	4.21976	49.3061	14.5363	124.456	692.467	47.7733	4.21976	NA
TS12-SCS2-Z1-10	50.784	52336.9	0.601797	13.0997	2.32452	1.80244	3.41507	0.171245	2.50185	0.732593	1018.97	23.5805	1046.34	22.3061	1103.95	46.4808	1103.95	46.4808	92.3017
TS12-SCS2-Z1-11	27.2417	62597.2	0.903827	6.19806	1.01022	10.5081	1.71275	0.472365	1.3831	0.807531	2493.92	28.6047	2480.63	15.8811	2469.74	17.0566	2469.74	17.0566	100.979
TS12-SCS2-Z1-12	139.329	6095.46	1.7221	8.94467	2.30796	4.70003	3.20362	0.304904	2.22183	0.693537	1715.58	33.4671	1767.24	26.8285	1828.84	41.8475	1828.84	41.8475	93.8071
TS12-SCS2-Z1-13	611.923	148939	8.61773	8.66111	0.110311	5.16338	1.47598	0.324345	1.47185	0.997203	1810.91	23.2376	1846.6	12.5559	1887.04	1.98602	1887.04	1.98602	95.9659
TS12-SCS2-Z1-14	235.629	702786	1.80765	5.20212	0.151438	13.951	1.47912	0.526362	1.47135	0.994745	2726.11	32.7088	2746.39	14.0151	2761.32	2.48658	2761.32	2.48658	98.7249
TS12-SCS2-Z1-15	23.8873	47467.4	0.460332	8.45504	2.13479	5.60663	2.54151	0.343808	1.3791	0.542631	1904.96	22.7455	1917.12	21.9033	1930.27	38.238	1930.27	38.238	98.6888
TS12-SCS2-Z1-16	39.6908	74660.2	0.761688	8.61512	1.58479	5.31867	2.55155	0.332325	1.99971	0.783723	1849.64	32.1545	1871.87	21.8111	1896.61	28.4998	1896.61	28.4998	97.5233
TS12-SCS2-Z1-17	370.491	9238.56	4.38606	9.25032	0.877294	4.25726	1.40778	0.285618	1.101	0.782081	1619.59	15.7681	1685.14	11.5759	1767.7	16.0246	1767.7	16.0246	91.6217
TS12-SCS2-Z1-18	124.912	161294	1.54444	9.49061	0.557117	4.49821	4.40456	0.309623	4.36918	0.991968	1738.85	66.5918	1730.64	36.6049	1720.72	10.2372	1720.72	10.2372	101.054
TS12-SCS2-Z1-19	119.519	300.953	1.2975	13.5054	34.434	0.0802264	34.967	0.00785822	6.08196	0.173934	50.4593	3.05693	78.3577	26.3747	1042.66	715.851	50.4593	3.05693	NA
TS12-SCS2-Z1-19	71.3751	71893.2	0.616001	10.0022	1.29172	3.96198	1.9717	0.287412	1.48965	0.755515	1628.58	21.4383	1626.45	15.9869	1623.66	24.0299	1623.66	24.0299	100.303
TS12-SCS2-Z1-20	223.633	11032.7	1.02708	5.67542	0.665312	9.33291	4.70035	0.384161	4.65302	0.989932	2095.69	83.2539	2371.26	43.1336	2617.4	11.073	2617.4	11.073	80.0679
TS12-SCS2-Z1-21	67.4005	69513	2.64498	13.0334	1.78519	2.01547	2.33834	0.190517	1.51028	0.645875	1124.18	15.5803	1120.74	15.8707	1114.05	35.6342	1114.05	35.6342	100.909
TS12-SCS2-Z1-22	190.832	352256	4.54691	9.75918	0.258703	4.14963	1.46426	0.293712	1.44123	0.984269	1660.05	21.0929	1664.14	11.9813	1669.28	4.78476	1669.28	4.78476	99.4473
TS12-SCS2-Z1-23	252.018	280057	1.93249	9.55604	0.412129	4.16243	2.05102	0.288485	2.00919	0.979604	1633.95	28.9992	1666.66	16.7932	1708.08	7.58327	1708.08	7.58327	95.6601
TS12-SCS2-Z1-24	140.786	79186.9	2.44568	10.986	0.670253	3.15618	2.19712	0.251477	2.09239	0.952333	1446.09	27.1044	1446.51	16.9431	1447.11	12.7634	1447.11	12.7634	99.9296
Notes:
1. Analyses with >10% uncertainty (1-σ) in 206Pb/238U age are not included.
2. Analyses with >10% uncertainty (1-σ) in 206Pb/207Pb age are not included, unless 206Pb/238U age is <500 Ma.
3. Best age is determined from 206Pb/238U age for analyses with 206Pb/238U age <1000 Ma and from 206Pb/207Pb age for analyses with 206Pb/238U age >1000 Ma.
4. Concordance is based on 206Pb/238U age / 206Pb/207Pb age. Value is not reported for 206Pb/238U ages <500 Ma because of large uncertainty in 206Pb/207Pb age.
5. Analyses with 206Pb/238U age >500 Ma and with >20% discordance (<80% concordance) are not included.
6. Analyses with 206Pb/238U age >500 Ma and with >5% reverse discordance (<105% concordance) are not included.
7. All uncertainties are reported at the 1-σ level, and include only measurement errors.
8. Systematic errors are as follows (at 2-σ level): 0.9% (206Pb/238U) and 0.8% (206Pb/207Pb)
9. Analyses conducted by LA-MC-ICPMS, as described by Gehrels et al. (2008).
10. U concentration and U/Th are calibrated relative to Sri Lanka zircon standard and are accurate to ~20%.
11. Common Pb correction is from measured 204Pb with common Pb composition interpreted from Stacey and Kramers (1975).
12. Common Pb composition assigned uncertainties of 1.5 for 206Pb/204Pb, 0.3 for 207Pb/204Pb, and 2.0 for 208Pb/204Pb.
13. U/Pb and 206Pb/207Pb fractionation is calibrated relative to fragmetns of a large Sri Lanka zircon of 563.5 ± 3.2 Ma (2-σ).
14. U decay constants and composition are as follows: 238U = 9.845x10^(-10); 235U = 1.55125x10^(-10); 238U/235U = 137.88
15. Weighted mean and concordia plots determined with Isoplot (Ludwig, 2008).
16. This sandstone sample was very lean in detrital zircon grains.

## Sheet: (SCS6-Z1) Lower Dell
Appendix II. U/Pb detrital zircon geochronologic analyses by LA-ICP-MS analysis
	Isotope Ratios										Apparent Ages (Ma)
Analysis	U	206Pb	U/Th	206Pb*	± 1σ	207Pb*	± 1σ	206Pb*	± 1σ	error	206Pb*	± 1σ	207Pb*	± 1σ	206Pb*	± 1σ	Best Age	± 1σ	% conc
	(ppm)	204Pb		207Pb*	(%)	235U	(%)	238U	(%)	corr.	238U	(Ma)	235U	(Ma)	207Pb*	(Ma)	(Ma)	(Ma)
Sample TS12-SCS6-Z1: Lower Dell Formation; fluvial-alluvial sandstone
TS12-SCS6-Z1-1	87.449	160197	1.24532	9.85007	0.462315	4.06109	3.81486	0.290122	3.78675	0.99263	1642.14	54.8966	1646.53	31.0916	1652.12	8.56933	1652.12	8.56933	99.3962
TS12-SCS6-Z1-2	210.354	151946	2.07849	11.4359	0.363172	2.86953	2.22172	0.238001	2.19183	0.986549	1376.3	27.1635	1373.95	16.7306	1370.28	6.98968	1370.28	6.98968	100.439
TS12-SCS6-Z1-3	474.844	11637.2	1.26134	20.017	8.03781	0.0506623	8.67871	0.007355	3.27316	0.377148	47.2399	1.54058	50.181	4.24922	193.041	187.153	47.2399	1.54058	NA
TS12-SCS6-Z1-4	16.6892	14214.9	0.956863	13.6416	9.85722	1.80631	10.1311	0.178713	2.33975	0.230947	1059.94	22.8685	1047.74	66.3071	1022.38	199.947	1022.38	199.947	103.674
TS12-SCS6-Z1-5	228.228	9377.08	2.50813	24.9491	14.9308	0.0414116	15.5284	0.00749335	4.26616	0.274733	48.1252	2.04545	41.2013	6.26991	-345.673	386.877	48.1252	2.04545	NA
TS12-SCS6-Z1-6	271.766	10792.2	1.01535	23.5063	20.911	0.0436115	21.2499	0.00743505	3.78031	0.177898	47.7521	1.79851	43.344	9.01698	-194.329	528.129	47.7521	1.79851	NA
TS12-SCS6-Z1-7	225.237	14972.3	1.8783	24.5231	52.7992	0.0415251	52.9489	0.00738559	3.97947	0.0751568	47.4356	1.88076	41.312	21.4384	-301.447	1440.53	47.4356	1.88076	NA
TS12-SCS6-Z1-9	259.217	9002.03	1.38289	21.6646	10.5539	0.0477448	10.7786	0.00750198	2.18954	0.203137	48.1804	1.051	47.3575	4.98733	5.88342	254.684	48.1804	1.051	NA
TS12-SCS6-Z1-10	78.9738	9835.27	1.27495	6.02302	377.736	0.167925	377.892	0.00733548	10.8781	0.0287863	47.115	5.10654	157.617	618.244	2518	364.163	47.115	5.10654	NA
TS12-SCS6-Z1-11	84.5476	290081	1.8291	4.99055	0.270166	14.9027	0.968858	0.539401	0.930428	0.960335	2780.94	21.0166	2809.05	9.21926	2829.28	4.40503	2829.28	4.40503	98.2916
TS12-SCS6-Z1-12	198.537	3863.61	0.939531	19.9683	11.9791	0.0520698	12.9018	0.00754094	4.79139	0.371373	48.4297	2.31176	51.5403	6.48378	198.677	279.103	48.4297	2.31176	NA
TS12-SCS6-Z1-13	24.5368	64252.1	0.731677	5.43346	1.08328	12.8081	1.86209	0.504733	1.51455	0.813362	2634.1	32.7497	2665.64	17.5398	2689.64	17.9032	2689.64	17.9032	97.935
TS12-SCS6-Z1-14	76.0578	50058.8	0.62051	10.5894	1.23993	3.49775	2.13365	0.268633	1.73638	0.813809	1533.86	23.7022	1526.71	16.8495	1516.8	23.3914	1516.8	23.3914	101.125
TS12-SCS6-Z1-15	925.748	25102.4	1.23493	21.2362	3.2805	0.048086	3.92866	0.00740619	2.16163	0.550222	47.5675	1.02445	47.6881	1.83019	53.7422	78.27	47.5675	1.02445	NA
TS12-SCS6-Z1-16	115.29	4980.71	2.70205	16.1913	16.3317	0.0678271	16.8832	0.00796498	4.27976	0.253492	51.1422	2.1801	66.6354	10.8894	665.841	351.875	51.1422	2.1801	NA
TS12-SCS6-Z1-17	468.386	32749.6	1.75497	22.0223	11.2412	0.0486331	11.4849	0.00776773	2.35346	0.204917	49.8805	1.16939	48.218	5.40843	-33.6654	273.415	49.8805	1.16939	NA
TS12-SCS6-Z1-19	77.4148	44659.9	2.38928	9.64938	0.84367	4.03553	4.85344	0.282422	4.77955	0.984776	1603.55	67.8561	1641.39	39.5143	1690.18	15.5609	1690.18	15.5609	94.8748
TS12-SCS6-Z1-20	605.858	25560.4	1.0934	20.1617	8.14387	0.052253	8.31051	0.00764076	1.65588	0.199251	49.0683	0.809428	51.7171	4.19036	176.226	190.193	49.0683	0.809428	NA
TS12-SCS6-Z1-21	149.604	6373.26	1.16191	29.2155	35.9852	0.0360293	36.8294	0.00763428	7.84019	0.212878	49.0268	3.82922	35.9399	13.0057	-771.054	1041.83	49.0268	3.82922	NA
TS12-SCS6-Z1-22	370.639	8111.94	0.775368	22.5957	13.9451	0.0450895	14.2894	0.00738923	3.11804	0.218206	47.4589	1.47435	44.7809	6.25995	-96.3896	343.799	47.4589	1.47435	NA
TS12-SCS6-Z1-24	100.028	131252	2.20488	9.87562	0.317104	4.11125	1.7228	0.294467	1.69337	0.982914	1663.81	24.8323	1656.54	14.0715	1647.31	5.88135	1647.31	5.88135	101.002
TS12-SCS6-Z1-25	194.73	11591.9	0.999017	25.4926	25.4257	0.0410854	25.7617	0.00759627	4.14716	0.160982	48.7837	2.0155	40.8832	10.3233	-401.58	672.218	48.7837	2.0155	NA
TS12-SCS6-Z1-26	325.614	86029.7	1.46106	17.7691	1.68329	0.524029	2.14967	0.0675337	1.33702	0.621965	421.28	5.4525	427.839	7.50537	463.349	37.3262	421.28	5.4525	90.9207
TS12-SCS6-Z1-27	348.167	4174.02	1.73269	20.9149	12.7842	0.050081	13.1649	0.00759675	3.14283	0.238728	48.7867	1.52749	49.619	6.37533	90.0385	304.01	48.7867	1.52749	NA
TS12-SCS6-Z1-28	2527.6	85794.9	1.00178	20.9012	1.48971	0.0495289	2.19325	0.00750807	1.60969	0.733928	48.2194	0.773284	49.085	1.05095	91.5456	35.3195	48.2194	0.773284	NA
TS12-SCS6-Z1-29	50.5648	1217.39	1.60833	12.1723	96.8647	0.0857036	97.5414	0.0075661	11.4694	0.117585	48.5906	5.55212	83.4932	78.337	1249.16	#VALUE!	48.5906	5.55212	NA
TS12-SCS6-Z1-30	1150.93	40640.6	2.2724	21.3142	3.47678	0.0469692	3.66734	0.00726076	1.16677	0.318153	46.6368	0.542183	46.6056	1.67056	44.9799	83.1159	46.6368	0.542183	NA
TS12-SCS6-Z1-31	102.079	135795	2.61332	8.87549	0.342009	5.17521	1.3679	0.333134	1.32446	0.968239	1853.55	21.3355	1848.55	11.6407	1842.9	6.19036	1842.9	6.19036	100.578
TS12-SCS6-Z1-32	93.921	35230.1	3.10135	6.77938	0.570643	7.0463	7.36025	0.346458	7.33809	0.99699	1917.66	121.734	2117.29	65.5375	2317.2	9.78869	2317.2	9.78869	82.7577
TS12-SCS6-Z1-33	64.7274	94774	3.55622	9.15215	0.600727	4.80792	1.24027	0.319138	1.08507	0.874872	1785.52	16.9226	1786.28	10.4255	1787.16	10.9458	1787.16	10.9458	99.9082
TS12-SCS6-Z1-34	71.4954	2646.23	1.64981	19.5143	39.0681	0.0543296	40.3252	0.00768934	9.99003	0.247737	49.3791	4.91414	53.719	21.1023	251.86	931.231	49.3791	4.91414	NA
TS12-SCS6-Z1-35	45.7738	88061.3	1.81084	12.4105	2.07068	2.2398	3.06174	0.201604	2.25533	0.736617	1183.93	24.3931	1193.6	21.4958	1211.14	40.7408	1211.14	40.7408	97.7531
TS12-SCS6-Z1-36	140.813	311013	1.3214	9.43556	0.84474	4.52242	2.33117	0.309483	2.17273	0.932035	1738.16	33.1029	1735.1	19.3864	1731.4	15.4999	1731.4	15.4999	100.391
TS12-SCS6-Z1-37	168.579	6666.19	0.932466	24.7977	38.8486	0.0423363	39.0436	0.00761418	3.89717	0.0998159	48.8982	1.89844	42.1024	16.1035	-330	1032.1	48.8982	1.89844	NA
TS12-SCS6-Z1-38	99.8712	89608.8	1.59882	11.3317	0.591204	2.91549	2.13693	0.239609	2.05352	0.960968	1384.67	25.5881	1385.94	16.1578	1387.88	11.3489	1387.88	11.3489	99.7685
TS12-SCS6-Z1-39	61.286	27836.2	1.78145	9.15065	0.960484	4.02403	2.28593	0.267062	2.07436	0.907445	1525.87	28.1851	1639.06	18.5931	1787.46	17.5016	1787.46	17.5016	85.3655
TS12-SCS6-Z1-40	390.168	13986.4	1.77217	19.4754	10.0988	0.0545253	10.5766	0.00770163	3.14296	0.297163	49.4577	1.54849	53.9074	5.5529	256.455	232.642	49.4577	1.54849	NA
TS12-SCS6-Z1-41	65.4402	2160.88	0.680989	16.3251	102.12	0.0639711	102.451	0.00757422	8.22666	0.0802982	48.6426	3.9866	62.9621	62.6255	648.235	563.884	48.6426	3.9866	NA
TS12-SCS6-Z1-42	173.129	8234.13	1.91409	19.0715	10.1231	0.0531473	10.9273	0.00735131	4.1146	0.376542	47.2162	1.93566	52.5797	5.5994	304.376	231.218	47.2162	1.93566	NA
TS12-SCS6-Z1-43	227.533	180250	2.62344	9.28051	0.568979	1.40696	5.21438	0.0947003	5.18324	0.994029	583.276	28.9054	891.875	30.9585	1761.74	10.4017	1761.74	10.4017	33.1079
TS12-SCS6-Z1-44	65.4472	2517.74	1.42973	1.16078	2048.86	0.857733	2048.89	0.00722108	11.0338	0.00538527	46.3828	5.09943	628.884	#NUM!	NA	NA	46.3828	5.09943	NA
TS12-SCS6-Z1-45	28.2682	44061.5	0.880739	8.95057	1.06196	5.11719	1.5401	0.332186	1.11542	0.724251	1848.97	17.9297	1838.96	13.0823	1827.64	19.2558	1827.64	19.2558	101.167
TS12-SCS6-Z1-47	368.619	6308.9	2.20759	20.1848	6.44885	0.0529298	9.26667	0.0077486	6.65459	0.718121	49.7581	3.29845	52.37	4.72996	173.553	150.623	49.7581	3.29845	NA
TS12-SCS6-Z1-49	74.3586	50183.7	2.22323	13.7879	2.58258	1.63169	2.75798	0.163168	0.967853	0.350928	974.356	8.75225	982.51	17.3646	1000.76	52.4491	1000.76	52.4491	97.362
TS12-SCS6-Z1-50	432.258	9270.01	2.38898	9.16148	0.190457	4.39117	1.00607	0.291773	0.987878	0.981918	1650.38	14.384	1710.68	8.3208	1785.3	3.47167	1785.3	3.47167	92.4426
TS12-SCS6-Z1-51	201.06	7200.86	1.24056	25.4664	35.782	0.0400334	36.11	0.00739417	4.85557	0.134466	47.4905	2.29746	39.8567	14.1143	-398.899	958.741	47.4905	2.29746	NA
TS12-SCS6-Z1-52	166.54	11591.5	1.41892	21.4372	16.5808	0.0778871	17.6141	0.0121097	5.9443	0.337473	77.595	4.58483	76.1565	12.9243	31.2166	399.619	77.595	4.58483	NA
TS12-SCS6-Z1-53	161.546	5291.89	2.0378	18.7396	24.8142	0.0544217	24.8643	0.00739659	1.57725	0.0634341	47.506	0.746533	53.8077	13.0313	344.237	569.284	47.506	0.746533	NA
TS12-SCS6-Z1-54	476.28	11382.3	0.824001	20.8917	8.91389	0.0484565	9.02032	0.00734218	1.38157	0.153162	47.1578	0.64914	48.047	4.23308	92.6463	211.495	47.1578	0.64914	NA
TS12-SCS6-Z1-55	49.8011	51024.1	0.612551	5.39185	0.621754	12.2348	1.41012	0.478445	1.26565	0.897546	2520.49	26.4035	2622.58	13.237	2702.35	10.2652	2702.35	10.2652	93.2705
TS12-SCS6-Z1-57	21.7884	94554.3	1.07775	6.67067	0.823887	8.88132	2.40581	0.429681	2.26034	0.939533	2304.28	43.7931	2325.88	21.9595	2344.88	14.0893	2344.88	14.0893	98.2684
TS12-SCS6-Z1-58	73.5903	18210	1.47287	17.4725	8.89237	0.610411	9.99274	0.0773527	4.55859	0.45619	480.302	21.0993	483.819	38.4776	500.541	196.169	480.302	21.0993	95.9565
TS12-SCS6-Z1-59	201.167	5937.19	1.92116	21.5503	20.8223	0.0481691	21.5296	0.0075287	5.47336	0.254225	48.3513	2.63655	47.7686	10.0466	18.6398	504.781	48.3513	2.63655	NA
TS12-SCS6-Z1-60	394.109	13811.3	1.21419	21.636	8.36502	0.0469361	8.99184	0.00736515	3.29843	0.366825	47.3048	1.5546	46.5735	4.09324	9.1015	201.581	47.3048	1.5546	NA
TS12-SCS6-Z1-61	131.144	8255.49	1.09556	20.2831	32.7713	0.0510546	33.3752	0.00751047	6.32021	0.189368	48.2347	3.03716	50.56	16.4627	162.228	785.027	48.2347	3.03716	NA
TS12-SCS6-Z1-62	940.111	55831.8	1.70627	21.0518	4.71748	0.0497539	5.89623	0.00759653	3.53708	0.599887	48.7853	1.71906	49.3027	2.83756	74.5086	112.154	48.7853	1.71906	NA
TS12-SCS6-Z1-63	133.459	8710.17	1.37069	28.9954	62.7413	0.0366753	62.8786	0.00771263	4.15271	0.0660434	49.5281	2.04888	36.5729	22.591	-749.783	1934.05	49.5281	2.04888	NA
TS12-SCS6-Z1-64	223.161	473073	1.75407	8.11405	0.270696	6.09777	1.57363	0.358845	1.55017	0.985093	1976.7	26.3899	1989.93	13.728	2003.68	4.80508	2003.68	4.80508	98.6534
TS12-SCS6-Z1-66	314.484	18737.4	2.9806	21.5251	6.46349	0.0957508	6.70744	0.0149481	1.79251	0.267242	95.6486	1.70185	92.8464	5.95145	21.4176	155.279	95.6486	1.70185	NA
TS12-SCS6-Z1-67	172.802	3130.05	1.57591	27.0712	36.8612	0.0372659	37.2362	0.00731675	5.27103	0.141557	46.9951	2.46812	37.1511	13.5845	-560.919	1022.58	46.9951	2.46812	NA
TS12-SCS6-Z1-68	853.033	31910.7	1.78839	21.5849	4.437	0.0480597	4.75153	0.00752367	1.70002	0.357784	48.3191	0.818364	47.6626	2.21238	14.7825	106.673	48.3191	0.818364	NA
TS12-SCS6-Z1-69	95.1864	155386	2.07949	9.39128	0.465115	4.60688	0.711837	0.313784	0.538869	0.757012	1759.3	8.29674	1750.51	5.93883	1740.03	8.52415	1740.03	8.52415	101.108
TS12-SCS6-Z1-70	61.5877	3296.11	0.794214	4.75032	427.205	0.21765	427.319	0.0074986	9.86291	0.0230809	48.1587	4.73215	199.952	1020.77	2909.48	177.736	48.1587	4.73215	NA
TS12-SCS6-Z1-71	149.369	527566	2.18091	11.1232	0.47547	3.03502	1.21035	0.244844	1.11305	0.919609	1411.83	14.1127	1416.47	9.24422	1423.44	9.08317	1423.44	9.08317	99.1845
TS12-SCS6-Z1-72	456.271	16386.8	1.16829	21.0382	6.88446	0.049769	7.3811	0.0075939	2.66174	0.360615	48.7685	1.29319	49.3173	3.55319	76.0501	163.723	48.7685	1.29319	NA
TS12-SCS6-Z1-73	53.1679	47953.9	2.31203	11.7439	1.25545	2.74256	1.83679	0.233596	1.34076	0.729949	1353.32	16.3668	1340.07	13.6679	1318.96	24.3349	1318.96	24.3349	102.605
TS12-SCS6-Z1-74	149.214	4195.25	1.09965	25.9443	22.9098	0.039597	23.4544	0.00745082	5.02452	0.214225	47.853	2.39548	39.4305	9.07116	-447.623	609.853	47.853	2.39548	NA
TS12-SCS6-Z1-75	1145.2	36354.1	1.2154	20.6255	7.82654	0.0507147	7.94508	0.00758642	1.36736	0.172101	48.7206	0.663673	50.2316	3.89385	122.914	184.584	48.7206	0.663673	NA
TS12-SCS6-Z1-76	530.309	455184	1.37412	11.3875	0.158271	2.86238	1.02354	0.236404	1.01123	0.987972	1367.98	12.4642	1372.07	7.7022	1378.43	3.0421	1378.43	3.0421	99.2416
TS12-SCS6-Z1-78	82.6669	66585.4	2.25892	12.7717	0.988517	2.06289	1.77207	0.191083	1.47074	0.829954	1127.24	15.2102	1136.58	12.1193	1154.43	19.6354	1154.43	19.6354	97.6445
TS12-SCS6-Z1-79	884.571	32950.4	0.925171	21.7961	5.6373	0.0491349	6.10806	0.00776727	2.35143	0.384973	49.8776	1.16831	48.7038	2.90464	-8.67868	136.184	49.8776	1.16831	NA
TS12-SCS6-Z1-80	167.874	104832	0.600975	17.2174	2.47424	0.705821	2.62946	0.0881373	0.890076	0.338501	544.512	4.64752	542.262	11.0478	532.836	54.2083	544.512	4.64752	102.191
TS12-SCS6-Z1-81	152.78	43509.2	1.62215	18.1272	2.53837	0.542499	3.22058	0.0713229	1.98211	0.615453	444.121	8.50659	440.071	11.5015	418.92	56.7045	444.121	8.50659	106.016
TS12-SCS6-Z1-82	286.336	9125.12	2.7222	17.6211	1.43477	0.597153	3.00329	0.0763164	2.6384	0.878504	474.098	12.0597	475.425	11.4021	481.854	31.7001	474.098	12.0597	98.3904
TS12-SCS6-Z1-83	87.3102	29715.6	1.99701	18.3594	3.39974	0.52432	3.66609	0.0698158	1.37187	0.374204	435.046	5.77131	428.033	12.8049	390.432	76.3222	435.046	5.77131	111.427
TS12-SCS6-Z1-84	165.909	8853.88	1.40047	21.1109	31.3974	0.0498159	31.6948	0.00762735	4.33224	0.136686	48.9825	2.114	49.3626	15.2723	67.884	763.629	48.9825	2.114	NA
TS12-SCS6-Z1-85	291.074	12265.5	0.881494	20.8862	10.5844	0.0496303	11.1034	0.00751804	3.35493	0.302153	48.2831	1.61381	49.1831	5.33091	93.2486	251.279	48.2831	1.61381	NA
TS12-SCS6-Z1-86	167.859	3823.65	0.4473	9.28756	3.31446	4.46492	3.85945	0.300756	1.97729	0.512326	1695.06	29.4721	1724.47	32.0279	1760.35	60.6127	1760.35	60.6127	96.2906
TS12-SCS6-Z1-87	356.677	14040.3	1.04278	20.8416	20.5648	0.048167	20.7985	0.00728082	3.10927	0.149494	46.7651	1.44879	47.7666	9.705	98.3442	491.055	46.7651	1.44879	NA
TS12-SCS6-Z1-88	298.082	7549.8	1.76151	20.9875	8.31091	0.0492321	8.66483	0.0074939	2.45112	0.282882	48.1287	1.1753	48.7978	4.12828	81.7752	197.546	48.1287	1.1753	NA
TS12-SCS6-Z1-89	102.796	96586.1	2.71457	8.75316	0.559045	5.15345	1.86998	0.327161	1.78446	0.954266	1824.61	28.3573	1844.96	15.9031	1867.98	10.0882	1867.98	10.0882	97.6778
TS12-SCS6-Z1-90	125.413	200276	1.07352	8.72273	0.497887	5.37925	0.910032	0.340309	0.761753	0.837061	1888.15	12.4681	1881.56	7.79197	1874.27	8.97774	1874.27	8.97774	100.741
TS12-SCS6-Z1-91	124.255	167195	1.62833	9.38659	0.461988	4.50349	1.00023	0.306588	0.887145	0.886941	1723.9	13.4193	1731.62	8.31094	1740.94	8.46586	1740.94	8.46586	99.0208
TS12-SCS6-Z1-92	230.157	12078.3	1.09722	22.5307	15.5601	0.0456401	16.3293	0.00745798	4.95262	0.303297	47.8988	2.36345	45.3158	7.23717	-89.3296	383.473	47.8988	2.36345	NA
TS12-SCS6-Z1-93	549.06	10503.4	1.14423	21.6047	9.75771	0.0481585	10.2049	0.00754605	2.98787	0.292787	48.4624	1.44256	47.7583	4.76089	12.531	235.101	48.4624	1.44256	NA
TS12-SCS6-Z1-94	17.9716	34238.3	1.24783	6.38688	1.47787	9.58606	2.90784	0.444045	2.50428	0.861217	2368.72	49.6428	2395.83	26.7428	2418.95	25.0833	2418.95	25.0833	97.9236
TS12-SCS6-Z1-95	201.316	15739.4	0.901802	23.4747	21.1427	0.0438589	21.4052	0.00746719	3.34195	0.156128	47.9577	1.59678	43.5847	9.13223	-190.968	533.742	47.9577	1.59678	NA
TS12-SCS6-Z1-96	715.348	32704.1	1.19244	20.8594	6.02717	0.0478317	6.1379	0.00723629	1.16061	0.189089	46.4801	0.537512	47.4418	2.84495	96.3243	142.78	46.4801	0.537512	NA
TS12-SCS6-Z1-97	69.4013	57122.1	1.25313	9.27836	0.808165	4.66531	1.79653	0.313943	1.60449	0.893105	1760.08	24.7133	1761.04	15.0229	1762.17	14.7737	1762.17	14.7737	99.8816
TS12-SCS6-Z1-98	31.3743	50383.8	1.28237	9.11064	1.62823	4.896	2.82448	0.323511	2.30793	0.817117	1806.85	36.3669	1801.57	23.8194	1795.44	29.6407	1795.44	29.6407	100.636
TS12-SCS6-Z1-99	594.112	13755.5	0.895866	21.0944	4.45439	0.0486241	4.71266	0.00743904	1.53869	0.326502	47.7777	0.732434	48.2093	2.21885	69.7501	105.988	47.7777	0.732434	NA
TS12-SCS6-Z1-100	277.449	15156.1	1.64135	23.4239	20.0293	0.0447633	20.4341	0.00760466	4.04724	0.198063	48.8373	1.9691	44.464	8.88997	-185.548	504.614	48.8373	1.9691	NA
Notes:
1. Analyses with >10% uncertainty (1-σ) in 206Pb/238U age are not included.
2. Analyses with >10% uncertainty (1-σ) in 206Pb/207Pb age are not included, unless 206Pb/238U age is <500 Ma.
3. Best age is determined from 206Pb/238U age for analyses with 206Pb/238U age <1000 Ma and from 206Pb/207Pb age for analyses with 206Pb/238U age >1000 Ma.
4. Concordance is based on 206Pb/238U age / 206Pb/207Pb age. Value is not reported for 206Pb/238U ages <500 Ma because of large uncertainty in 206Pb/207Pb age.
5. Analyses with 206Pb/238U age >500 Ma and with >20% discordance (<80% concordance) are not included.
6. Analyses with 206Pb/238U age >500 Ma and with >5% reverse discordance (<105% concordance) are not included.
7. All uncertainties are reported at the 1-σ level, and include only measurement errors.
8. Systematic errors are as follows (at 2-σ level): 1.1% (206Pb/238U) and 0.7% (206Pb/207Pb)
9. Analyses conducted by LA-MC-ICPMS, as described by Gehrels et al. (2008).
10. U concentration and U/Th are calibrated relative to Sri Lanka zircon standard and are accurate to ~20%.
11. Common Pb correction is from measured 204Pb with common Pb composition interpreted from Stacey and Kramers (1975).
12. Common Pb composition assigned uncertainties of 1.5 for 206Pb/204Pb, 0.3 for 207Pb/204Pb, and 2.0 for 208Pb/204Pb.
13. U/Pb and 206Pb/207Pb fractionation is calibrated relative to fragmetns of a large Sri Lanka zircon of 563.5 ± 3.2 Ma (2-σ).
14. U decay constants and composition are as follows: 238U = 9.845x10^(-10); 235U = 1.55125x10^(-10); 238U/235U = 137.88
15. Weighted mean and concordia plots determined with Isoplot (Ludwig, 2008).
